# Supplementary material for: Inhibition of stearoyl-CoA desaturase 1 (SCD1) enhances the antitumor T cell response through regulating β-catenin signaling in cancer cells and ER stress in T cells and synergizes with anti-PD-1 antibody
Source: HighWire-hosted journal article supplement (doi:10.1136/jitc-2022-004616), 2022-07-01
Supplement: jitc-2022-004616supp004_data_supplement.pdf [file jitc-2022-004616supp004_data_supplement.pdf]

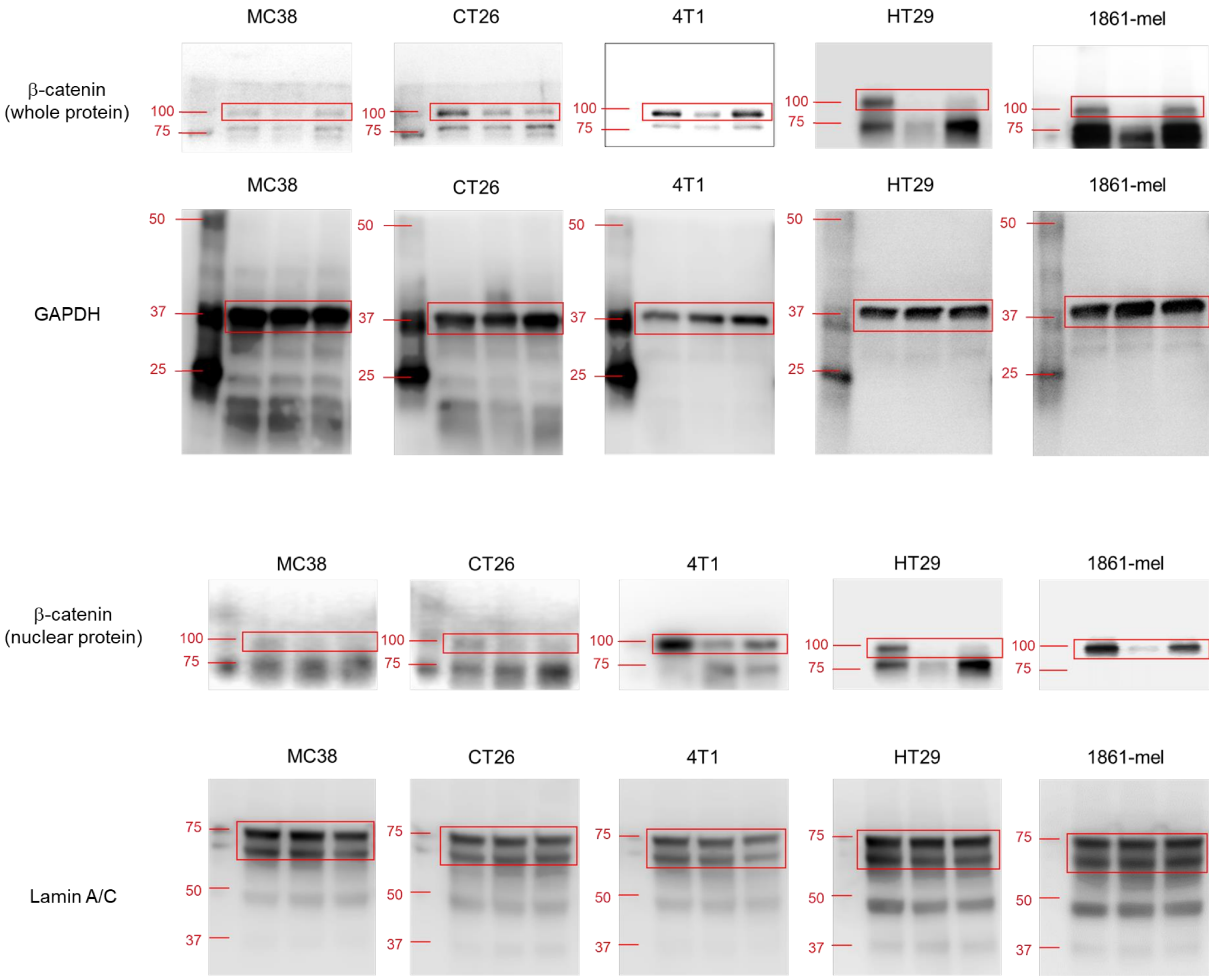

Source data 1 (related to figure 3E)
