# Supplementary material for: Inhibition of stearoyl-CoA desaturase 1 (SCD1) enhances the antitumor T cell response through regulating β-catenin signaling in cancer cells and ER stress in T cells and synergizes with anti-PD-1 antibody
Source: J Immunother Cancer. 2022 Jul 6;10(7):e004616. doi: 10.1136/jitc-2022-004616 (PMC9260842; doi:10.1136/jitc-2022-004616)
Supplement: Supplementary data [file jitc-2022-004616supp001.XLSX]

## Sheet: Sheet1
								1	2	3	4	5	6	7	8	9	10	11	12	13	14	15	16	17	18	19	20	21	22	23	24	25	26	27	28	29	30	31	32	33	34	35	36	37	38	39	40	41	42
cluster	Original row	GeneSymbol	ProbeName	GeneName	GO biological process	GO cellular component	GO molecular function	NCC299	NCC373	CRC106	CRC109	NCC214	NCC014	NCC293	NCC225	NCC261	NCC123	NCC139	NCC538	NCC199	NCC077	NCC358	NCC437	CRC107	CRC002	CRC023	CRC066	CRC019	CRC063	NCC087	NCC542	NCC090	NCC128	NCC256	CRC015	NCC085	NCC110	NCC250	NCC041	NCC399	CRC073	NCC106	NCC009	NCC052	NCC043	NCC001	CRC025	CRC014	CRC024
1	23	CCR6	A_24_P234921	chemokine (C-C motif) receptor 6	GO:0002407(dendritic cell chemotaxis);GO:0006928(movement of cell or subcellular component);GO:0006935(chemotaxis);GO:0006955(immune response);GO:0006959(humoral immune response);GO:0006968(cellular defense response);GO:0007165(signal transduction);GO:0007186(G-protein coupled receptor signaling pathway);GO:0007204(positive regulation of cytosolic calcium ion concentration);GO:0045087(innate immu…	GO:0005886(plasma membrane);GO:0005887(integral component of plasma membrane)	GO:0004872(receptor activity);GO:0004950(chemokine receptor activity);GO:0016493(C-C chemokine receptor activity)	-0.010132	0.0113019	-0.0112657	-0.0117625	0.0092348	0.0214733	0.0330966	0.017051	0.020276	-0.0139236	0.0996834	0.012294	0.0032052	0.0297004	0.0013402	-0.002861	0.042607	0.0134295	-0.0009316	-4.83e-05	-0.0136534	0.023927	0.020842	0.0141564	0.0160233	0.021858	0.389377	-0.0158671	0.0195466	0.0247391	0.0594965	0.0139876	-0.0047888	-0.0139236	0.0067805	0.0090092	-0.0036208	-0.0098113	-0.008742	1	-0.0124077	-0.0110742
2	62	PDCD1	A_23_P136405	programmed cell death 1	GO:0006915(apoptotic process);GO:0006959(humoral immune response);GO:0007165(signal transduction);GO:0007275(multicellular organismal development);GO:0031295(T cell costimulation);GO:0070234(positive regulation of T cell apoptotic process)	GO:0005886(plasma membrane);GO:0009897(external side of plasma membrane);GO:0016021(integral component of membrane)	GO:0004871(signal transducer activity);GO:0005515(protein binding)	0.227003	-0.192541	-0.42296	-0.392672	0.667649	-0.206473	1.16984	0.0458754	1.58407	-0.174393	-0.324659	1.51768	0.1968	1.25606	-0.151603	1.91312	0.197584	0.0483938	0.47178	1	0.508414	-0.0783836	-0.409283	1.35685	0.259062	0.0548642	2.08842	0.0170296	-0.227989	0.0038376	1.34902	-0.152887	-0.21881	-0.0653335	-0.289533	0.0386072	-0.214583	-0.364804	-0.211148	0.760874	-0.320397	0.12482
3	6	ELOVL4	A_23_P82065	ELOVL fatty acid elongase 4	GO:0006633(fatty acid biosynthetic process);GO:0009584(detection of visible light);GO:0019367(fatty acid elongation, saturated fatty acid);GO:0019432(triglyceride biosynthetic process);GO:0035338(long-chain fatty-acyl-CoA biosynthetic process);GO:0042761(very long-chain fatty acid biosynthetic process);GO:0044255(cellular lipid metabolic process);GO:0044281(small molecule metabolic process)	GO:0005783(endoplasmic reticulum);GO:0030176(integral component of endoplasmic reticulum membrane)	GO:0005515(protein binding);GO:0008020(G-protein coupled photoreceptor activity);GO:0016740(transferase activity)	-0.112717	-0.0398257	-0.240874	0.716452	-0.0005625	-0.187116	-0.170569	0.189042	-0.171399	0.412964	0.434615	0.106693	-0.0563775	-0.0751362	-0.199144	0.0465	0.164338	-0.19449	0.0087943	0.160599	0.0048609	0.0099714	-0.102239	1	0.0657818	0.641152	2.85208	-0.143215	0.182229	0.903289	0.0287301	-0.198072	-0.0105243	-0.0703678	0.096365	0.0047669	0.180828	-0.0703077	0.0313911	0.161291	0.0436859	-0.082392
4	36	EOMES	A_24_P97374	eomesodermin	GO:0000122(negative regulation of transcription from RNA polymerase II promoter);GO:0001706(endoderm formation);GO:0001707(mesoderm formation);GO:0001714(endodermal cell fate specification);GO:0001829(trophectodermal cell differentiation);GO:0002302(CD8-positive, alpha-beta T cell differentiation involved in immune response);GO:0006351(transcription, DNA-templated);GO:0007420(brain development);G…	GO:0005634(nucleus)	GO:0000977(RNA polymerase II regulatory region sequence-specific DNA binding);GO:0001102(RNA polymerase II activating transcription factor binding);GO:0001191(transcriptional repressor activity, RNA polymerase II transcription factor binding);GO:0003677(DNA binding);GO:0003682(chromatin binding);GO:0003700(transcription factor activity, sequence-specific DNA binding);GO:0043565(sequence-specific …	-0.287063	-0.276377	-0.152058	-0.440601	0.226033	-0.0772865	1.16283	1.23762	-0.140355	1.18396	0.129436	0.102937	0.0604208	0.0933206	-0.229479	0.0369525	0.0949402	-0.186787	-0.024971	0.104509	0.828035	0.343647	-0.15925	0.377367	2.12204	1.90882	0.885547	-0.155567	0.745787	2.01074	0.23088	-0.161142	0.195659	-0.253288	0.759827	1.40726	0.538028	0.142516	0.262343	0.168441	0.0453992	-0.0651932
5	19	CCL4	A_23_P207564	chemokine (C-C motif) ligand 4				0.02283	-0.095981	1.81902	-0.732598	0.816825	0.248794	0.572151	0.121096	0.294342	0.181424	0.226181	0.715883	0.0039075	0.076761	-0.204326	-0.446546	-0.211251	3.35258	-1.08912	0.664456	-0.033586	0.852471	-0.359871	0.243771	-0.053158	0.633672	0.76879	-1.07235	1.07962	-1.5202	0.044758	-0.581175	0.111687	-0.541324	-0.708796	0.066121	0.0113543	-0.686108	0.70916	-0.173989	-0.455571	0.0799325
6	50	IKZF2	A_32_P127978	IKAROS family zinc finger 2 (Helios)	GO:0006351(transcription, DNA-templated);GO:0008150(biological_process);GO:0045944(positive regulation of transcription from RNA polymerase II promoter)	GO:0005634(nucleus)	GO:0003674(molecular_function);GO:0003677(DNA binding);GO:0005515(protein binding);GO:0042803(protein homodimerization activity);GO:0046872(metal ion binding);GO:0046982(protein heterodimerization activity)	-0.139568	1.86295	4.51089	2.86377	0.745143	0.207267	-0.401357	1.30037	0.805466	1.88484	1.50867	1.62311	1.88626	2.06377	1.67647	1.47896	1.31457	2.23439	1	-0.202421	-0.0193424	-0.442771	-0.218297	3.45718	2.97549	3.22924	-1.15957	-0.627075	-0.812537	-0.195242	0.796549	0.0316405	0.470821	-0.641168	-0.890563	-0.499472	0.569915	-1.01512	-0.750602	-0.901157	-0.912592	-0.292983
7	5	ELOVL3	A_23_P149858	ELOVL fatty acid elongase 3	GO:0007623(circadian rhythm);GO:0019367(fatty acid elongation, saturated fatty acid);GO:0019432(triglyceride biosynthetic process);GO:0034625(fatty acid elongation, monounsaturated fatty acid);GO:0034626(fatty acid elongation, polyunsaturated fatty acid);GO:0035338(long-chain fatty-acyl-CoA biosynthetic process);GO:0042761(very long-chain fatty acid biosynthetic process);GO:0044255(cellular lipid…	GO:0005783(endoplasmic reticulum);GO:0005789(endoplasmic reticulum membrane);GO:0016021(integral component of membrane)	GO:0005515(protein binding);GO:0016740(transferase activity)	0.400173	0.017454	0.047871	-0.123516	1.71784	1.04317	1.09082	1.28145	0.762529	0.883563	0.713233	1.38857	0.177337	1.04658	1.79826	0.660706	0.595977	-0.189958	-0.0054035	-0.325837	-0.069841	0.207002	0.624548	1.18724	0.236643	-0.463148	2.25638	-0.830786	-0.470038	0.336756	0.468479	0.934991	-0.315323	-0.11033	-1.02348	-1.20128	-1.79943	-2.17741	-0.669322	-0.818845	-1.34431	-1.40576
8	58	MS4A1	A_23_P116371	membrane-spanning 4-domains, subfamily A, member 1	GO:0006959(humoral immune response);GO:0042100(B cell proliferation)	GO:0005615(extracellular space);GO:0005887(integral component of plasma membrane);GO:0009897(external side of plasma membrane);GO:0070062(extracellular exosome)	GO:0005154(epidermal growth factor receptor binding);GO:0023026(MHC class II protein complex binding)	0.740518	0.38715	-0.154051	-0.101753	1.49733	1.30933	1.38705	1.5346	0.862939	1.06313	0.933375	1.46486	0.242576	1.18609	2.07788	0.658473	0.637386	-0.045608	-0.065381	-0.142722	-0.117366	0.224936	0.893044	1.01987	0.539543	-0.599831	2.45542	-0.921826	-0.644759	0.145368	0.372336	0.795324	-0.039499	-0.317973	-1.14567	-1.44218	-1.42389	-1.31984	-0.910349	-1.06437	-1.71041	-1.49559
9	29	CD8A	A_32_P163247	CD8a molecule	GO:0002456(T cell mediated immunity);GO:0006955(immune response);GO:0007169(transmembrane receptor protein tyrosine kinase signaling pathway);GO:0019882(antigen processing and presentation);GO:0042110(T cell activation);GO:0045065(cytotoxic T cell differentiation);GO:0050776(regulation of immune response);GO:0050850(positive regulation of calcium-mediated signaling);GO:0051607(defense response to…	GO:0005576(extracellular region);GO:0005886(plasma membrane);GO:0005887(integral component of plasma membrane);GO:0009897(external side of plasma membrane);GO:0042101(T cell receptor complex)	GO:0005515(protein binding);GO:0015026(coreceptor activity);GO:0019901(protein kinase binding);GO:0042288(MHC class I protein binding);GO:0042803(protein homodimerization activity)	0.599526	1.07638	0.802668	-0.09534	0.884929	1.69396	2.64035	2.02118	1.6226	1.15499	1.83007	1.3962	1.581	1.37535	0.263816	1.16825	1.14728	1.5046	-0.74402	-1.44476	-0.577115	-1.19036	2.00548	1.76781	1.90341	0.64536	1.9781	-1.09241	-1.11553	0.152959	1	-0.398745	-0.173451	-0.713001	-0.146054	0.175404	-0.612859	-1.61086	-1.88071	-1.52023	-1.48553	-2.58831
10	18	C10orf54	A_23_P24077	chromosome 10 open reading frame 54	GO:0002725(negative regulation of T cell cytokine production);GO:0030509(BMP signaling pathway);GO:0030513(positive regulation of BMP signaling pathway);GO:0048863(stem cell differentiation);GO:2000562(negative regulation of CD4-positive, alpha-beta T cell proliferation);GO:2000738(positive regulation of stem cell differentiation)	GO:0009897(external side of plasma membrane);GO:0016021(integral component of membrane)		1.02396	0.775683	0.148631	1.51439	0.723558	1.43022	2.45001	1.49029	1.82144	1.26983	1.18848	1.37083	1.60779	1.17748	0.692244	1.33185	0.782477	1.73925	0.199073	-0.465204	0.205773	1	1.30294	1.62718	1.23667	-0.048848	0.822045	-0.475204	-0.0402583	-0.580573	-0.0436796	-0.305402	-0.070546	-0.321149	-0.750748	-1.19823	-0.989083	-3.20213	-1.83678	-0.630711	-0.3114	-0.991776
11	26	CD274(PDL1)	A_23_P256487	CD274 molecule	GO:0006955(immune response);GO:0007165(signal transduction);GO:0007166(cell surface receptor signaling pathway);GO:0031295(T cell costimulation);GO:0032689(negative regulation of interferon-gamma production);GO:0032693(negative regulation of interleukin-10 production);GO:0042102(positive regulation of T cell proliferation);GO:0046006(regulation of activated T cell proliferation);GO:0046007(negati…	GO:0005886(plasma membrane);GO:0009897(external side of plasma membrane);GO:0012505(endomembrane system);GO:0016021(integral component of membrane);GO:0070062(extracellular exosome)	GO:0005515(protein binding)	1.46332	1.31145	-0.742222	1	0.606375	1.79166	3.34575	1.56103	2.61877	1.66447	1.80748	1.84706	2.51548	2.29188	1.75848	1.22319	1.57301	1.74762	0.622713	0.15375	0.553964	0.995309	1.1365	1.14468	1.30319	0.338943	0.941634	-0.913254	-1.99783	-0.972613	1.28701	-0.48291	-0.898702	-0.18542	-2.71477	-1.75909	-2.35331	-3.24247	-2.79285	-1.87566	-1.2523	-1.67702
12	53	IL27	A_23_P315320	interleukin 27	GO:0006954(inflammatory response);GO:0009617(response to bacterium);GO:0042129(regulation of T cell proliferation);GO:0045078(positive regulation of interferon-gamma biosynthetic process);GO:0045087(innate immune response);GO:0045625(regulation of T-helper 1 cell differentiation);GO:0050688(regulation of defense response to virus)	GO:0005615(extracellular space)	GO:0005102(receptor binding);GO:0005125(cytokine activity);GO:0045523(interleukin-27 receptor binding)	0.211994	0.154049	-0.365891	1	0.565285	0.074469	0.841423	0.218327	0.90922	0.145337	0.506208	0.566881	0.862285	0.113624	0.253946	0.558329	0.2136	0.618732	-1.17944	-1.21895	-0.762177	0.528329	0.320227	0.497225	0.330275	-0.143443	-0.164083	-1.45059	-1.61546	-1.22332	0.331528	0.016787	0.754716	-0.8078	-1.37129	-1.12414	-1.54527	-2.18761	-2.09286	-1.23514	-1.50674	-1.1605
13	42	GZMH	A_23_P128993	granzyme H (cathepsin G-like 2, protein h-CCPX)	GO:0006508(proteolysis);GO:0006915(apoptotic process);GO:0006955(immune response);GO:0016485(protein processing);GO:0019835(cytolysis)	GO:0005737(cytoplasm);GO:0016020(membrane);GO:0043231(intracellular membrane-bounded organelle)	GO:0004252(serine-type endopeptidase activity)	0.332322	0.448075	0.0498696	-0.63951	0.965001	1.04963	1.6127	1.2414	1.068	1.01312	1.00792	1.24312	0.907329	0.814525	0.502182	0.626242	0.0531106	2.50129	-0.370385	-0.565937	-0.0711789	-0.495635	0.417131	0.737427	0.185696	-0.311196	0.386457	-0.531967	-0.876848	-0.205564	0.271418	-0.123305	0.431836	-0.636203	-1.05399	0.781767	-1.46606	-1.94407	-0.62144	-0.711606	-0.231974	0.299011
14	75	CD4	A_24_P295999	CD4 molecule	GO:0001816(cytokine production);GO:0006948(induction by virus of host cell-cell fusion);GO:0006955(immune response);GO:0007165(signal transduction);GO:0007166(cell surface receptor signaling pathway);GO:0007167(enzyme linked receptor protein signaling pathway);GO:0007169(transmembrane receptor protein tyrosine kinase signaling pathway);GO:0016032(viral process);GO:0030217(T cell differentiation);…	GO:0005769(early endosome);GO:0005788(endoplasmic reticulum lumen);GO:0005789(endoplasmic reticulum membrane);GO:0005886(plasma membrane);GO:0009897(external side of plasma membrane);GO:0016021(integral component of membrane);GO:0042101(T cell receptor complex);GO:0045121(membrane raft)	GO:0001948(glycoprotein binding);GO:0004872(receptor activity);GO:0004888(transmembrane signaling receptor activity);GO:0005201(extracellular matrix structural constituent);GO:0005515(protein binding);GO:0008270(zinc ion binding);GO:0015026(coreceptor activity);GO:0019899(enzyme binding);GO:0019901(protein kinase binding);GO:0042289(MHC class II protein binding);GO:0042803(protein homodimerizatio…	-0.025211	-0.074132	-0.045561	0.06532	0.907949	0.037416	1.13748	1.52868	0.472126	1.26195	0.989451	1.01605	0.611461	0.053373	0.034031	1.64211	1.01605	0.803034	-0.033642	-0.474314	0.168323	0.995573	0.410158	0.094329	0.514632	-0.021796	1.05015	-0.765172	-0.779597	1.03194	-0.162214	-0.532468	0.661925	-0.485177	-0.463074	-0.461039	-0.950545	-1.02301	-1.06557	0.047825	-0.330438	-0.91645
15	70	THBD	A_23_P91390	thrombomodulin	GO:0007165(signal transduction);GO:0007565(female pregnancy);GO:0007596(blood coagulation);GO:0010165(response to X-ray);GO:0010544(negative regulation of platelet activation);GO:0030195(negative regulation of blood coagulation);GO:0032496(response to lipopolysaccharide);GO:0050900(leukocyte migration);GO:0051591(response to cAMP);GO:0051918(negative regulation of fibrinolysis)	GO:0005615(extracellular space);GO:0005886(plasma membrane);GO:0005887(integral component of plasma membrane);GO:0009986(cell surface)	GO:0004872(receptor activity);GO:0004888(transmembrane signaling receptor activity);GO:0005509(calcium ion binding);GO:0005515(protein binding)	0.207227	1.79475	0.391951	-0.11088	-0.226417	0.55456	1.44593	0.0364592	2.02668	2.07357	1.14219	0.888547	1.58517	1.20998	0.991901	-0.189618	-0.117827	-0.472676	-0.23964	-0.0682816	-0.22351	1.77439	-0.182689	1.14392	1.75759	0.559925	0.290778	-0.405025	1	0.84634	-0.217724	-0.475796	-0.232405	0.337704	-0.119832	1.41528	2.01846	-0.327913	-0.173145	0.48383	-0.181079	-0.331046
16	71	TIGIT	A_23_P80528	T cell immunoreceptor with Ig and ITIM domains	GO:0032695(negative regulation of interleukin-12 production);GO:0032733(positive regulation of interleukin-10 production);GO:0050868(negative regulation of T cell activation)	GO:0005886(plasma membrane);GO:0009986(cell surface);GO:0016021(integral component of membrane)	GO:0005102(receptor binding);GO:0005515(protein binding)	0.558911	2.35551	-0.423913	-0.436961	0.72359	0.103623	1.05601	1.49312	0.664558	-0.220945	-0.389386	2.9743	0.838609	0.290736	-0.311179	-0.409091	0.0292454	-0.0207052	0.363639	-0.100865	1.4137	-0.208226	0.645174	-0.266645	0.0584503	-0.04066	-0.639266	-0.150505	-0.391867	-0.0117885	0.457162	0.463732	0.545967	-0.215359	-0.452319	0.920848	1.86617	1.32058	0.596586	0.274564	0.522808	1
17	64	RORC(RORg)	A_23_P372910	RAR-related orphan receptor C	GO:0006367(transcription initiation from RNA polymerase II promoter);GO:0006468(protein phosphorylation);GO:0006805(xenobiotic metabolic process);GO:0010467(gene expression);GO:0010906(regulation of glucose metabolic process);GO:0019218(regulation of steroid metabolic process);GO:0030522(intracellular receptor signaling pathway);GO:0032922(circadian regulation of gene expression);GO:0033077(T cel…	GO:0005634(nucleus);GO:0005654(nucleoplasm)	GO:0001223(transcription coactivator binding);GO:0003677(DNA binding);GO:0003700(transcription factor activity, sequence-specific DNA binding);GO:0003707(steroid hormone receptor activity);GO:0004879(RNA polymerase II transcription factor activity, ligand-activated sequence-specific DNA binding);GO:0005515(protein binding);GO:0008142(oxysterol binding);GO:0008270(zinc ion binding);GO:0043565(sequ…	0.170201	0.413069	-0.401873	-0.972248	0.535903	0.878482	0.997053	-0.0148234	0.516748	0.519172	0.105217	0.0241781	-0.341694	1.03419	0.0484466	-0.16247	0.523121	1.19487	0.552415	0.399937	0.753315	0.883892	0.304239	-0.548009	0.163426	-0.607994	0.54775	0.63275	0.250617	0.71415	-0.500248	-0.511038	-0.66796	0.457895	-0.121307	1	-1.05727	-0.221781	-0.4511	-0.283564	0.0991612	1.25841
18	13	FADS6	A_24_P211842	fatty acid desaturase 6	GO:0006633(fatty acid biosynthetic process);GO:0055114(oxidation-reduction process)	GO:0016021(integral component of membrane)	GO:0016491(oxidoreductase activity)	-0.346954	-0.164284	-1.7896	-2.18004	-0.564542	1.16207	0.434451	0.310265	0.627942	0.992354	0.973316	-0.154223	-0.0991352	0.362333	-0.264045	0.448102	0.429382	0.877807	1.05074	0.938295	0.804103	3.19218	0.041809	-0.120312	1.20477	-2.40114	-0.0989183	0.951101	0.308612	-2.41481	0.004825	0.237168	1	1.8427	1.40626	-0.146553	-2.43628	-1.25273	-0.145238	0.0541135	1.67636	0.464367
19	32	CXCL2	A_24_P257416	chemokine (C-X-C motif) ligand 2	GO:0002237(response to molecule of bacterial origin);GO:0002690(positive regulation of leukocyte chemotaxis);GO:0006935(chemotaxis);GO:0006954(inflammatory response);GO:0006955(immune response);GO:0007186(G-protein coupled receptor signaling pathway);GO:0032496(response to lipopolysaccharide);GO:0042127(regulation of cell proliferation);GO:0060326(cell chemotaxis);GO:0070098(chemokine-mediated si…	GO:0005576(extracellular region);GO:0005615(extracellular space)	GO:0005515(protein binding);GO:0008009(chemokine activity);GO:0045236(CXCR chemokine receptor binding)	1.71301	-0.327243	-0.874008	-0.804057	1	-0.055581	-0.067845	0.235846	-0.083808	0.155743	0.495903	0.341187	-0.205929	-0.217288	0.153633	0.581203	0.544643	-0.167279	0.374619	0.548757	-0.14713	0.337761	-0.069457	-0.091362	-0.842787	-0.631764	0.586855	1.03263	0.394329	0.772591	0.435364	0.65828	0.477816	0.333857	0.606882	0.915295	-0.582047	-0.239487	-0.080008	-0.323924	0.94608	0.102659
20	63	PRF1	A_23_P1473	perforin 1 (pore forming protein)	GO:0001771(immunological synapse formation);GO:0002357(defense response to tumor cell);GO:0002418(immune response to tumor cell);GO:0006915(apoptotic process);GO:0006968(cellular defense response);GO:0019835(cytolysis);GO:0051260(protein homooligomerization);GO:0051607(defense response to virus);GO:0055085(transmembrane transport)	GO:0005576(extracellular region);GO:0005886(plasma membrane);GO:0016020(membrane);GO:0016021(integral component of membrane);GO:0016023(cytoplasmic membrane-bounded vesicle);GO:0031904(endosome lumen);GO:0044194(cytolytic granule)	GO:0005509(calcium ion binding);GO:0005515(protein binding);GO:0022829(wide pore channel activity)	1	1.21197	-0.999758	-2.08556	0.260885	0.0598321	-0.26782	0.659896	-0.158489	0.386756	0.156829	1.79395	0.212709	0.325385	0.0840903	0.0005496	-0.0619734	-2.73085	0.278355	1.83781	2.16207	0.172408	-1.90573	1.04831	-0.571266	1.5321	-0.167411	0.009254	1.45911	1.0486	-0.301622	-0.783109	1.88848	0.957715	-0.487035	0.469911	-0.791146	-0.771588	0.194717	0.397913	0.130321	-0.749373
21	48	IFIT1	A_23_P52266	interferon-induced protein with tetratricopeptide repeats 1	GO:0009615(response to virus);GO:0019060(intracellular transport of viral protein in host cell);GO:0019221(cytokine-mediated signaling pathway);GO:0032091(negative regulation of protein binding);GO:0045070(positive regulation of viral genome replication);GO:0045071(negative regulation of viral genome replication);GO:0050689(negative regulation of defense response to virus by host);GO:0051097(nega…	GO:0005737(cytoplasm);GO:0005829(cytosol)	GO:0003723(RNA binding);GO:0005515(protein binding)	-1.29233	0.0559063	0.0620303	-0.504652	0.230942	0.0353828	0.417653	1.06145	0.388884	0.330832	-0.158119	0.786388	1	0.26854	-0.058446	0.116094	1.03924	0.641808	1.15146	0.638416	1.09391	0.998842	-0.132435	-0.05073	-0.358997	-0.449811	2.10584	0.796776	0.563469	0.466662	-0.212832	0.695684	1.44805	0.007094	-0.683183	-0.896516	-1.00599	-1.64349	0.536565	0.205765	0.0247054	-0.753484
22	8	ELOVL6	A_23_P7361	ELOVL fatty acid elongase 6	GO:0019367(fatty acid elongation, saturated fatty acid);GO:0019432(triglyceride biosynthetic process);GO:0035338(long-chain fatty-acyl-CoA biosynthetic process);GO:0042759(long-chain fatty acid biosynthetic process);GO:0044255(cellular lipid metabolic process);GO:0044281(small molecule metabolic process)	GO:0005783(endoplasmic reticulum);GO:0005789(endoplasmic reticulum membrane);GO:0030176(integral component of endoplasmic reticulum membrane)	GO:0005515(protein binding);GO:0016747(transferase activity, transferring acyl groups other than amino-acyl groups)	-0.949331	-0.053514	-0.123318	-1.2621	-0.219677	0.414065	1.00267	0.985303	0.546653	1.03871	0.776463	0.265797	0.0114854	0.5282	0.705802	0.4345	0.915222	-0.910028	0.59333	0.986631	0.678284	1.13031	-0.0658963	-0.42174	-0.899657	0.217908	1	0.136422	0.139187	1.29235	0.177765	0.879472	0.156269	0.499073	-0.617681	-1.38753	-0.533346	-1.96825	-0.252414	-0.606386	-0.434524	0.099983
23	49	IFNG	A_23_P151294	interferon, gamma	GO:0000060(protein import into nucleus, translocation);GO:0000122(negative regulation of transcription from RNA polymerase II promoter);GO:0001781(neutrophil apoptotic process);GO:0002026(regulation of the force of heart contraction);GO:0002053(positive regulation of mesenchymal cell proliferation);GO:0002250(adaptive immune response);GO:0002302(CD8-positive, alpha-beta T cell differentiation inv…	GO:0005576(extracellular region);GO:0005615(extracellular space);GO:0009897(external side of plasma membrane)	GO:0005125(cytokine activity);GO:0005133(interferon-gamma receptor binding)	-0.680992	-0.0068597	-1.72094	-1.85507	0.0486287	0.379999	0.241932	0.558052	0.419647	0.69785	0.113407	0.486106	-0.0523376	0.252646	0.375512	0.493118	0.722961	0.0399824	0.799651	0.572528	0.930621	1.56974	-0.282503	-0.580001	-1.33262	0.139753	0.303682	0.659425	0.649158	1.2382	0.16332	0.344153	0.0800133	1	-0.138313	-0.098566	-1.11355	-1.73378	0.206868	0.113008	-0.500519	-0.927617
24	55	LAG3	A_23_P116942	lymphocyte-activation gene 3	GO:0007166(cell surface receptor signaling pathway);GO:0045085(negative regulation of interleukin-2 biosynthetic process);GO:0045954(positive regulation of natural killer cell mediated cytotoxicity);GO:0050868(negative regulation of T cell activation)	GO:0009897(external side of plasma membrane);GO:0016021(integral component of membrane)	GO:0003823(antigen binding);GO:0004888(transmembrane signaling receptor activity);GO:0042289(MHC class II protein binding)	-0.146922	0.609288	-0.969093	-1.95975	0.070826	0.269435	0.625325	0.250014	0.589005	0.633589	0.34608	0.473876	-0.265875	0.537482	0.474053	0.434308	0.633804	0.798975	0.874477	0.836825	0.771299	0.615804	0.0096812	0.294263	-0.23766	0.735695	0.40087	0.70314	0.632332	0.908846	-0.193131	-0.162966	-0.334913	-0.257852	-0.605161	-0.0139399	-1.26613	-1.62897	0.257339	0.354867	0.0429936	1
25	61	NOS2	A_23_P502464	nitric oxide synthase 2, inducible	GO:0001666(response to hypoxia);GO:0001912(positive regulation of leukocyte mediated cytotoxicity);GO:0002227(innate immune response in mucosa);GO:0006527(arginine catabolic process);GO:0006801(superoxide metabolic process);GO:0006809(nitric oxide biosynthetic process);GO:0006954(inflammatory response);GO:0007263(nitric oxide mediated signal transduction);GO:0007596(blood coagulation);GO:0007623(…	GO:0005622(intracellular);GO:0005634(nucleus);GO:0005737(cytoplasm);GO:0005777(peroxisome);GO:0005829(cytosol);GO:0030863(cortical cytoskeleton);GO:0048471(perinuclear region of cytoplasm)	GO:0003958(NADPH-hemoprotein reductase activity);GO:0004517(nitric-oxide synthase activity);GO:0005102(receptor binding);GO:0005506(iron ion binding);GO:0005515(protein binding);GO:0005516(calmodulin binding);GO:0010181(FMN binding);GO:0020037(heme binding);GO:0034617(tetrahydrobiopterin binding);GO:0034618(arginine binding);GO:0042803(protein homodimerization activity);GO:0050660(flavin adenine …	-0.198684	-0.543854	0.799657	0.572754	1	0.0134473	0.84143	0.191983	0.744134	0.56418	0.245515	0.0449105	-0.118827	0.32488	0.141708	0.414723	0.889228	1.37208	1.28565	1.12656	1.26408	1.38968	-0.130482	0.187301	-0.164014	-0.34167	0.194467	0.672363	-0.137694	0.378389	0.193157	0.658833	-0.0289826	-0.147602	-0.325287	-0.0240453	0.0207424	-1.32402	-0.353279	0.343423	-0.0207128	-0.380279
26	47	ICOS	A_23_P371215	inducible T-cell co-stimulator	GO:0002517(T cell tolerance induction);GO:0006955(immune response);GO:0016337(single organismal cell-cell adhesion);GO:0031295(T cell costimulation)	GO:0005576(extracellular region);GO:0005886(plasma membrane);GO:0005887(integral component of plasma membrane);GO:0009897(external side of plasma membrane)		-0.136131	-0.0012704	0.60278	0.603258	0.216059	0.624244	1.01679	0.530341	0.682918	0.624867	0.793285	0.536017	0.358141	0.29234	0.526785	0.229553	1.16993	2.12802	0.897764	0.276954	0.84158	0.803395	-0.032682	0.101071	-0.206815	0.745774	-0.203759	0.13209	-0.351927	0.319708	0.159202	0.26964	-0.300785	0.055731	-0.56378	-0.285066	-1.36098	-1.05534	-0.012097	1	-0.288866	-0.629437
27	52	IL21	A_23_P167250	interleukin 21	GO:0002729(positive regulation of natural killer cell cytokine production);GO:0006955(immune response);GO:0007165(signal transduction);GO:0008284(positive regulation of cell proliferation);GO:0030890(positive regulation of B cell proliferation);GO:0032733(positive regulation of interleukin-10 production);GO:0032740(positive regulation of interleukin-17 production);GO:0032825(positive regulation o…	GO:0005615(extracellular space)	GO:0005125(cytokine activity);GO:0005126(cytokine receptor binding);GO:0005134(interleukin-2 receptor binding)	-0.322547	-0.141789	0.460529	0.616248	0.157661	0.138868	0.419048	0.448898	0.575437	0.588365	0.331484	0.240842	0.317132	0.282069	0.570159	0.454506	1.08897	0.912451	0.769768	0.229112	0.77619	0.725961	0.116472	0.272026	-0.012077	0.33449	-0.144633	0.01756	1	0.8876	0.322458	0.671171	-0.021306	-0.020499	-0.292681	-0.624892	-1.1101	-1.71134	-0.210925	-0.032099	-0.575829	-0.874508
28	51	IL10	A_23_P126735	interleukin 10	GO:0002237(response to molecule of bacterial origin);GO:0002740(negative regulation of cytokine secretion involved in immune response);GO:0002875(negative regulation of chronic inflammatory response to antigenic stimulus);GO:0002904(positive regulation of B cell apoptotic process);GO:0006954(inflammatory response);GO:0007253(cytoplasmic sequestering of NF-kappaB);GO:0007267(cell-cell signaling);G…	GO:0005615(extracellular space)	GO:0005125(cytokine activity);GO:0005141(interleukin-10 receptor binding);GO:0008083(growth factor activity)	-0.550396	-0.180794	1	0.0626734	0.570222	0.186487	0.414834	0.503559	0.539075	0.613818	0.29326	0.360344	0.126113	0.407546	1.39831	0.562191	0.956614	0.755751	0.887271	0.569245	0.794876	0.881632	-0.0299116	0.239294	-0.426274	-0.0513706	1.37972	0.0899464	-0.0701696	0.598943	0.540634	0.847295	0.120608	0.379079	-0.462882	-0.763104	-1.2675	-2.02562	-0.234452	-0.0565676	-0.549939	-0.729727
29	41	GZMB	A_23_P117602	granzyme B (granzyme 2, cytotoxic T-lymphocyte-associated serine esterase 1)	GO:0006508(proteolysis);GO:0006915(apoptotic process);GO:0006955(immune response);GO:0007219(Notch signaling pathway);GO:0008626(granzyme-mediated apoptotic signaling pathway);GO:0016485(protein processing);GO:0019835(cytolysis);GO:0097193(intrinsic apoptotic signaling pathway);GO:1900740(positive regulation of protein insertion into mitochondrial membrane involved in apoptotic signaling pathway)	GO:0001772(immunological synapse);GO:0005634(nucleus);GO:0005737(cytoplasm);GO:0005829(cytosol);GO:0016020(membrane);GO:0043231(intracellular membrane-bounded organelle)	GO:0004252(serine-type endopeptidase activity);GO:0005515(protein binding);GO:0008236(serine-type peptidase activity)	-0.721849	-0.0429456	-0.1074	-0.296386	0.0658954	0.434575	0.488406	0.503291	0.460535	0.747088	0.56768	0.51742	-0.155331	0.296566	0.655971	0.560686	0.751364	0.442137	0.803358	0.462415	0.847199	1.6166	1	-0.392563	-0.308976	-0.0369721	0.223722	0.37351	0.0701771	0.545113	0.328604	0.431891	0.0327468	0.148685	-0.576657	-0.649326	-1.4662	-1.86277	-0.140183	-0.0796733	-0.786688	-1.12766
30	24	CD163	A_23_P33723	CD163 molecule	GO:0006898(receptor-mediated endocytosis);GO:0006953(acute-phase response)	GO:0005576(extracellular region);GO:0005886(plasma membrane);GO:0005887(integral component of plasma membrane);GO:0030666(endocytic vesicle membrane)	GO:0005044(scavenger receptor activity);GO:0005515(protein binding)	0.472499	0.721976	1.5393	1.51317	0.4742	1.00686	2.39442	1.06552	2.01494	1.34736	0.960722	0.980753	1.97083	1.58383	1.02619	0.925306	1.86792	2.41081	1.84245	1.62238	1.84591	2.28566	0.925855	1.03489	-0.472217	-2.32405	-2.66566	1.29508	-0.108077	-2.44273	1	-0.174913	-0.195844	0.835294	-0.224966	-2.39124	-2.62087	-2.66219	-0.780148	0.0179493	-0.203857	0.0478458
31	68	TBX21(T-BET)	A_23_P141555	T-box 21	GO:0006351(transcription, DNA-templated);GO:0006355(regulation of transcription, DNA-templated);GO:0007275(multicellular organismal development);GO:0009615(response to virus);GO:0030217(T cell differentiation);GO:0045893(positive regulation of transcription, DNA-templated);GO:0048304(positive regulation of isotype switching to IgG isotypes);GO:0071310(cellular response to organic substance);GO:00…	GO:0005634(nucleus);GO:0043025(neuronal cell body)	GO:0003700(transcription factor activity, sequence-specific DNA binding);GO:0044212(transcription regulatory region DNA binding)	0.039214	-0.186636	1.99303	1.79863	0.579404	0.374994	1.03223	0.718022	0.724014	0.017218	-0.164218	0.692292	0.341021	0.700526	0.437001	-1.11028	1.97032	2.99598	0.486014	1	1.07517	0.926301	0.432503	0.831999	0.078361	1.35294	-1.73773	0.205756	-0.392431	-0.403276	-0.506147	-1.15785	-0.615643	0.419085	0.102587	-0.2622	-1.7171	-2.22536	-1.17008	-0.406296	0.127285	-0.440678
32	74	XCR1	A_23_P18246	chemokine (C motif) receptor 1	GO:0006935(chemotaxis);GO:0006954(inflammatory response);GO:0007186(G-protein coupled receptor signaling pathway);GO:0007187(G-protein coupled receptor signaling pathway, coupled to cyclic nucleotide second messenger);GO:0007204(positive regulation of cytosolic calcium ion concentration);GO:0051209(release of sequestered calcium ion into cytosol);GO:0070098(chemokine-mediated signaling pathway)	GO:0005886(plasma membrane);GO:0005887(integral component of plasma membrane)	GO:0004950(chemokine receptor activity)	0.39003	0.136542	1.20494	0.992664	0.088905	0.156117	1.32907	0.295194	0.637744	0.360607	0.248919	0.786893	0.803191	0.820439	0.203292	-0.029329	0.617662	0.58826	0.197661	0.386977	0.934748	0.88512	0.304633	0.430356	1	-0.235242	-0.0407135	-0.166386	-0.670107	0.166714	0.126497	-0.297404	0.238591	0.174321	-1.13642	-1.0297	-1.73859	-2.10641	-1.23566	-0.649001	-0.582429	-0.730878
33	44	GZMM	A_23_P130836	granzyme M (lymphocyte met-ase 1)	GO:0006508(proteolysis);GO:0006915(apoptotic process);GO:0019835(cytolysis);GO:0045087(innate immune response)	GO:0005576(extracellular region);GO:0016020(membrane)	GO:0004252(serine-type endopeptidase activity);GO:0008236(serine-type peptidase activity)	0.696019	0.733777	0.496069	0.0906365	0.611315	0.897632	1.74114	0.578618	1.57119	0.999297	1.09599	1.14708	1.215	0.801265	0.616083	0.595435	0.409894	0.780912	0.472447	2.51649	3.26286	1.12777	0.967766	1.21737	0.998881	0.021392	-0.048023	-0.317234	-0.239338	1	1.03499	-0.12694	-0.036379	-0.788245	-1.45893	-0.974529	-1.71974	-2.40847	-1.18294	-0.85211	-1.21614	-0.689485
34	9	ELOVL7	A_24_P32473	ELOVL fatty acid elongase 7	GO:0019367(fatty acid elongation, saturated fatty acid);GO:0019432(triglyceride biosynthetic process);GO:0034626(fatty acid elongation, polyunsaturated fatty acid);GO:0035338(long-chain fatty-acyl-CoA biosynthetic process);GO:0042761(very long-chain fatty acid biosynthetic process);GO:0044255(cellular lipid metabolic process);GO:0044281(small molecule metabolic process)	GO:0005783(endoplasmic reticulum);GO:0005789(endoplasmic reticulum membrane);GO:0016021(integral component of membrane)	GO:0005515(protein binding);GO:0016740(transferase activity)	-0.240672	0.266599	-0.333425	0.540065	0.387204	-0.225524	1.03798	0.79024	1.07501	0.763834	1	0.780645	-0.0019736	0.805617	1.05578	0.830098	0.803348	1.09234	1.13898	0.847311	1.1319	0.449633	0.661167	0.512502	-1.33572	-0.632566	-0.895364	1.07277	-1.05159	-0.255962	0.347631	0.755929	0.333319	-0.164904	-1.36419	-0.135117	-1.44932	-0.21681	-0.572897	-1.426	-1.15221	-1.66246
35	60	NOS1	A_23_P204791	nitric oxide synthase 1 (neuronal)	GO:0001666(response to hypoxia);GO:0002028(regulation of sodium ion transport);GO:0006527(arginine catabolic process);GO:0006809(nitric oxide biosynthetic process);GO:0006941(striated muscle contraction);GO:0007263(nitric oxide mediated signal transduction);GO:0007520(myoblast fusion);GO:0007596(blood coagulation);GO:0009408(response to heat);GO:0010523(negative regulation of calcium ion transpor…	GO:0001917(photoreceptor inner segment);GO:0005737(cytoplasm);GO:0005739(mitochondrion);GO:0005829(cytosol);GO:0005856(cytoskeleton);GO:0016529(sarcoplasmic reticulum);GO:0042383(sarcolemma);GO:0043197(dendritic spine);GO:0043234(protein complex);GO:0045121(membrane raft);GO:0045202(synapse);GO:0048471(perinuclear region of cytoplasm)	GO:0003958(NADPH-hemoprotein reductase activity);GO:0004517(nitric-oxide synthase activity);GO:0005506(iron ion binding);GO:0005515(protein binding);GO:0005516(calmodulin binding);GO:0010181(FMN binding);GO:0016491(oxidoreductase activity);GO:0017080(sodium channel regulator activity);GO:0020037(heme binding);GO:0034617(tetrahydrobiopterin binding);GO:0034618(arginine binding);GO:0044325(ion chan…	-0.558292	0.450695	-0.402579	-1.01868	0.457743	0.106843	0.748036	0.301654	0.822196	0.319028	1.08813	1.01643	0.196292	0.747164	1.10113	0.858195	1.17196	0.368334	1.08255	0.333677	1.18243	-0.21812	-0.188289	-0.0643239	-0.55598	1.36191	0.0462156	1.06843	-0.523438	-1.28651	0.570431	1	0.569621	-1.03736	1.8041	-0.712975	-1.95692	-1.03434	-0.763538	0.238269	-0.642721	-1.95032
36	12	FADS3	A_23_P64404	fatty acid desaturase 3	GO:0006636(unsaturated fatty acid biosynthetic process);GO:0055114(oxidation-reduction process)	GO:0005789(endoplasmic reticulum membrane);GO:0016020(membrane);GO:0016021(integral component of membrane)	GO:0003674(molecular_function);GO:0005506(iron ion binding);GO:0016717(oxidoreductase activity, acting on paired donors, with oxidation of a pair of donors resulting in the reduction of molecular oxygen to two molecules of water);GO:0020037(heme binding)	0.891138	-0.234567	-2.99767	-4.26369	0.438144	1.22727	-1.28313	0.328435	1.11348	-0.0379546	0.353114	0.775533	0.867396	0.892045	1.03699	-0.291266	-0.142536	0.701175	1.76486	2.18306	1.34195	-1.53024	0.659871	0.817678	-0.118713	2.35231	0.576991	0.415949	-0.171106	1.04494	-0.09561	8.18341	1	1.00164	-0.179083	0.0899365	0.029835	-0.808676	-0.470215	-0.284514	0.282983	-0.0434677
37	57	MRC1(CD206)	A_23_P12746	mannose receptor, C type 1	GO:0006898(receptor-mediated endocytosis);GO:0007165(signal transduction);GO:0071222(cellular response to lipopolysaccharide);GO:0071346(cellular response to interferon-gamma);GO:0071353(cellular response to interleukin-4)	GO:0005886(plasma membrane);GO:0005887(integral component of plasma membrane);GO:0009986(cell surface);GO:0010008(endosome membrane)	GO:0004872(receptor activity);GO:0004888(transmembrane signaling receptor activity);GO:0005515(protein binding);GO:0005537(mannose binding)	0.483978	0.710469	-1.22325	-0.590056	-0.275505	0.402989	0.62351	-1.01997	0.436635	-1.06778	-0.100528	1.21115	0.707574	0.947305	1	-1.8864	0.205188	1.7016	0.485682	-2.66975	0.186815	-0.327039	0.703414	-0.347232	-0.799527	-2.52736	-1.97982	0.500592	-0.481899	-2.23482	-0.160581	-1.9474	0.789851	0.671776	-0.169779	0.091242	-1.08143	-0.902263	-0.403836	0.24029	-0.858062	-0.056228
38	59	MX1	A_23_P17663	MX dynamin-like GTPase 1	GO:0006915(apoptotic process);GO:0006952(defense response);GO:0007165(signal transduction);GO:0008152(metabolic process);GO:0009615(response to virus);GO:0019221(cytokine-mediated signaling pathway);GO:0034340(response to type I interferon);GO:0045071(negative regulation of viral genome replication);GO:0045087(innate immune response);GO:0051607(defense response to virus);GO:0060337(type I interfe…	GO:0005737(cytoplasm);GO:0005789(endoplasmic reticulum membrane);GO:0005829(cytosol);GO:0031965(nuclear membrane);GO:0048471(perinuclear region of cytoplasm)	GO:0003924(GTPase activity);GO:0005515(protein binding);GO:0005525(GTP binding)	-0.940003	-1.01393	-0.439285	-1.11595	-0.66736	0.147069	0.596235	-0.794484	0.460933	0.241241	-0.287892	0.0248207	-0.126503	0.0198173	0.0468254	-0.208613	0.468752	0.647856	0.961955	-0.699257	0.847002	0.384401	-0.606031	-0.476792	-1.01333	-2.74683	-2.57214	0.480338	-0.82014	-2.68199	-0.334995	1.36188	2.4532	0.228475	-1.28112	-0.721377	-2.73325	-1.78526	0.0338263	0.587188	1.86823	-2.10364
39	33	CXCR3	A_23_P114299	chemokine (C-X-C motif) receptor 3	GO:0001525(angiogenesis);GO:0001937(negative regulation of endothelial cell proliferation);GO:0002685(regulation of leukocyte migration);GO:0006915(apoptotic process);GO:0006928(movement of cell or subcellular component);GO:0006935(chemotaxis);GO:0006954(inflammatory response);GO:0007155(cell adhesion);GO:0007166(cell surface receptor signaling pathway);GO:0007186(G-protein coupled receptor signa…	GO:0005737(cytoplasm);GO:0005886(plasma membrane);GO:0005887(integral component of plasma membrane);GO:0009897(external side of plasma membrane)	GO:0004872(receptor activity);GO:0004950(chemokine receptor activity);GO:0016494(C-X-C chemokine receptor activity);GO:0019956(chemokine binding);GO:0019958(C-X-C chemokine binding)	-0.734151	0.488042	-0.292401	1.7218	1	-0.100528	-1.28993	-2.77029	0.471045	-1.63299	-1.14935	-0.228487	-0.451348	0.179419	0.506965	-0.533172	0.266984	0.703429	0.585262	0.801968	0.413323	-0.472586	0.237169	1.99263	-0.935806	-2.79053	0.256976	0.933505	-0.194583	-2.80357	-2.79769	-0.713926	0.438367	-0.44245	-2.81309	1.11566	-2.82427	-1.71897	0.453143	1.13942	1.19693	-0.169187
40	40	GZMA	A_23_P133445	granzyme A (granzyme 1, cytotoxic T-lymphocyte-associated serine esterase 3)	GO:0006915(apoptotic process);GO:0006955(immune response);GO:0019835(cytolysis);GO:0032078(negative regulation of endodeoxyribonuclease activity);GO:0043065(positive regulation of apoptotic process);GO:0043392(negative regulation of DNA binding);GO:0051354(negative regulation of oxidoreductase activity);GO:0051603(proteolysis involved in cellular protein catabolic process)	GO:0001772(immunological synapse);GO:0005576(extracellular region);GO:0005634(nucleus)	GO:0004252(serine-type endopeptidase activity);GO:0005515(protein binding);GO:0042803(protein homodimerization activity)	1	0.553751	0.396234	0.705043	-2.32951	-1.22114	0.691653	0.408367	-0.929392	-0.342729	0.053876	1.58205	0.819123	0.25021	-0.719892	0.528072	0.259831	1.00348	-0.218604	0.494714	0.808818	1.41906	-1.53837	0.564192	-2.30724	-1.5955	-0.129013	-1.46729	-1.26686	-2.214	-0.2476	-0.894419	-2.09984	0.917236	-1.19597	0.895003	0.436148	-1.76609	1.11175	1.72814	1.30027	-0.536601
41	30	CTLA4	A_23_P102481	cytotoxic T-lymphocyte-associated protein 4	GO:0006955(immune response);GO:0006974(cellular response to DNA damage stimulus);GO:0030889(negative regulation of B cell proliferation);GO:0031295(T cell costimulation);GO:0042130(negative regulation of T cell proliferation);GO:0043065(positive regulation of apoptotic process);GO:0045590(negative regulation of regulatory T cell differentiation);GO:0050777(negative regulation of immune response);…	GO:0005794(Golgi apparatus);GO:0005886(plasma membrane);GO:0005887(integral component of plasma membrane);GO:0009897(external side of plasma membrane);GO:0045334(clathrin-coated endocytic vesicle);GO:0048471(perinuclear region of cytoplasm)	GO:0005515(protein binding)	-0.0198302	0.445165	1.62232	-0.173819	1	-0.717608	-0.380091	0.0034638	-0.0765827	0.126244	-0.557582	0.426305	-0.267242	0.388826	0.192923	-0.335788	0.154724	-0.278448	0.337205	0.393692	0.630218	-0.37476	-0.899867	-0.813849	-1.5147	-3.29438	-0.0100587	0.47382	1.50592	0.203637	-0.792727	-0.262242	-0.855952	-0.757994	-0.20378	1.33332	0.131125	1.61749	0.705101	0.994515	0.128685	-1.0699
42	22	CCR4	A_23_P72989	chemokine (C-C motif) receptor 4	GO:0001764(neuron migration);GO:0002507(tolerance induction);GO:0006935(chemotaxis);GO:0006954(inflammatory response);GO:0006955(immune response);GO:0007186(G-protein coupled receptor signaling pathway);GO:0007204(positive regulation of cytosolic calcium ion concentration);GO:0009314(response to radiation);GO:0009617(response to bacterium);GO:0046677(response to antibiotic);GO:0050927(positive re…	GO:0005886(plasma membrane);GO:0005887(integral component of plasma membrane);GO:0009897(external side of plasma membrane);GO:0043025(neuronal cell body)	GO:0004950(chemokine receptor activity);GO:0016493(C-C chemokine receptor activity)	-0.473859	0.120258	2.24208	1.16434	-0.459817	0.030653	0.165556	0.0458	0.52764	-0.202072	0.28979	0.307696	-0.315248	0.1174	-0.204957	0.660854	3.0033	1.75287	0.601118	-0.623412	0.689055	2.32173	-0.406092	-0.522836	-2.47711	-2.55565	-2.53885	0.017134	0.867819	0.76784	0.552091	-0.172088	-0.111228	-0.106581	-0.104226	-0.678869	-2.58222	0.778931	1.47746	1.30108	-0.419276	0.473458
43	46	HTN1	A_24_P354429	histatin 1	GO:0031214(biomineral tissue development);GO:0031640(killing of cells of other organism);GO:0042742(defense response to bacterium);GO:0050832(defense response to fungus)	GO:0005576(extracellular region)	GO:0005515(protein binding)	-0.0181494	0.0106954	1.16255	1.1239	-0.0003958	-0.0116566	0.0277508	0.0016322	0.020631	-0.0062817	0.142788	0.0252708	-0.0202728	1.12849	-0.0092932	-0.0039252	0.0346641	2.61457	2.03621	2.30424	2.25859	2.4018	-0.0226665	1.36412	0.0158928	-0.0060859	0.303445	2.33086	-0.0151212	-0.0157922	-0.0098756	0.0016322	-0.0073252	-0.0166369	1.56645	0.0232277	-0.0207442	-0.0220166	-0.012101	-0.0102487	1.29084	0.283476
44	4	ELOVL2	A_23_P418556	ELOVL fatty acid elongase 2	GO:0006636(unsaturated fatty acid biosynthetic process);GO:0019432(triglyceride biosynthetic process);GO:0033559(unsaturated fatty acid metabolic process);GO:0034626(fatty acid elongation, polyunsaturated fatty acid);GO:0035338(long-chain fatty-acyl-CoA biosynthetic process);GO:0036109(alpha-linolenic acid metabolic process);GO:0042761(very long-chain fatty acid biosynthetic process);GO:0043651(l…	GO:0005783(endoplasmic reticulum);GO:0005789(endoplasmic reticulum membrane);GO:0016021(integral component of membrane)	GO:0005515(protein binding);GO:0009922(fatty acid elongase activity)	0.414723	0.632459	0.823781	2.22388	0.967423	0.857662	-0.187291	-0.0251469	-0.180171	0.14049	2.33747	0.761429	0.734134	0.541874	0.373973	-0.0892132	2.47871	1.89545	-0.0397005	0.0838687	2.86439	-0.0992802	0.0932655	1.15477	-0.143339	0.290412	0.100788	0.0721571	-0.0137124	0.514579	-0.126832	0.290232	-0.129485	-0.304817	-0.0751973	-0.0904522	0.0849225	0.185158	0.793712	0.0278161	1	-0.150965
45	38	FOXP3	A_23_P159709	forkhead box P3	GO:0000122(negative regulation of transcription from RNA polymerase II promoter);GO:0001782(B cell homeostasis);GO:0001816(cytokine production);GO:0002262(myeloid cell homeostasis);GO:0002361(CD4-positive, CD25-positive, alpha-beta regulatory T cell differentiation);GO:0002456(T cell mediated immunity);GO:0002513(tolerance induction to self antigen);GO:0002669(positive regulation of T cell anergy…	GO:0005634(nucleus);GO:0005737(cytoplasm);GO:0043234(protein complex)	GO:0000981(RNA polymerase II transcription factor activity, sequence-specific DNA binding);GO:0003700(transcription factor activity, sequence-specific DNA binding);GO:0003705(transcription factor activity, RNA polymerase II distal enhancer sequence-specific binding);GO:0003714(transcription corepressor activity);GO:0005515(protein binding);GO:0035035(histone acetyltransferase binding);GO:0042803(…	-0.48308	-0.249631	0.0036284	1	-0.063534	0.394329	-0.0610326	0.016544	0.23174	0.342134	0.116165	0.25193	0.031813	0.0983135	0.307223	0.292667	0.823676	0.186948	0.560339	-0.153846	0.446933	0.165605	-0.324995	-0.177502	-0.577666	0.264177	-0.488137	0.081659	1.12682	1.12017	0.373315	0.324743	-0.0695356	-0.0406674	0.125454	0.075369	-0.0297326	-0.467948	0.47598	-0.008333	-0.342582	-1.47808
46	39	GATA3	A_23_P75056	GATA binding protein 3	GO:0000122(negative regulation of transcription from RNA polymerase II promoter);GO:0001701(in utero embryonic development);GO:0001709(cell fate determination);GO:0001764(neuron migration);GO:0001806(type IV hypersensitivity);GO:0001822(kidney development);GO:0001823(mesonephros development);GO:0002088(lens development in camera-type eye);GO:0002572(pro-T cell differentiation);GO:0003180(aortic v…	GO:0000790(nuclear chromatin);GO:0005634(nucleus);GO:0005654(nucleoplasm);GO:0005730(nucleolus)	GO:0000976(transcription regulatory region sequence-specific DNA binding);GO:0000979(RNA polymerase II core promoter sequence-specific DNA binding);GO:0000987(core promoter proximal region sequence-specific DNA binding);GO:0001046(core promoter sequence-specific DNA binding);GO:0001071(nucleic acid binding transcription factor activity);GO:0001077(transcriptional activator activity, RNA polymeras…	-0.150965	0.424806	2.52967	2.20012	0.574432	0.56232	0.603094	0.360065	0.674328	0.954035	0.832251	0.99644	0.8778	0.766139	1.04012	0.44125	0.411229	-0.203768	0.037683	-0.120633	0.134775	0.675026	0.5525	0.0249791	-0.345864	-0.0524616	-0.109652	-0.149302	-0.0215359	0.45936	0.460261	0.58602	0.247936	-0.0872159	-0.379	-0.40486	-0.907178	-1.52382	-0.215799	0.179876	-0.341912	-2.49059
47	43	GZMK	A_23_P156218	granzyme K (granzyme 3; tryptase II)	GO:0006508(proteolysis)	GO:0005576(extracellular region)	GO:0004252(serine-type endopeptidase activity);GO:0008236(serine-type peptidase activity)	-0.729921	0.382487	2.55072	1.61861	0.878578	-0.392153	0.727744	-0.157874	0.22453	0.373839	0.0781333	-0.142388	-0.318608	-0.068187	0.280687	0.135687	0.686739	-0.189446	0.48193	0.832876	0.466869	0.068948	0.586175	-0.246908	-0.462793	1	0.041876	0.169617	1	0.937131	-0.211941	-0.383215	-0.269194	-0.0875156	0.327696	0.622262	-0.607519	-1.10264	0.276736	1.35842	0.0239913	-0.579906
48	21	CCR2	A_23_P324885	chemokine (C-C motif) receptor 2	GO:0001974(blood vessel remodeling);GO:0002407(dendritic cell chemotaxis);GO:0002827(positive regulation of T-helper 1 type immune response);GO:0002829(negative regulation of type 2 immune response);GO:0006874(cellular calcium ion homeostasis);GO:0006935(chemotaxis);GO:0006954(inflammatory response);GO:0006955(immune response);GO:0006968(cellular defense response);GO:0007186(G-protein coupled rec…	GO:0005737(cytoplasm);GO:0005829(cytosol);GO:0005886(plasma membrane);GO:0005887(integral component of plasma membrane);GO:0016021(integral component of membrane);GO:0030425(dendrite);GO:0043025(neuronal cell body);GO:0043204(perikaryon);GO:0048471(perinuclear region of cytoplasm)	GO:0004950(chemokine receptor activity);GO:0016493(C-C chemokine receptor activity);GO:0031727(CCR2 chemokine receptor binding);GO:0042803(protein homodimerization activity)	-0.416447	-0.325569	3.68851	3.95209	0.0420177	-0.214598	-0.313943	1.09498	-0.197418	0.293081	-0.0331166	-0.0493066	-0.125557	-0.0260928	-0.371547	-0.043891	0.281268	2.43106	-0.200763	1.38614	0.0682103	2.96942	-0.278548	0.0925047	0.593919	1.98042	0.989559	-0.481893	0.87752	2.19553	0.127826	-0.255372	1	-0.295681	0.391526	0.432354	0.661792	-0.0130029	0.0080805	0.128715	-0.0138607	0.0014748
49	27	CD38	A_23_P167328	CD38 molecule	GO:0001666(response to hypoxia);GO:0007165(signal transduction);GO:0007204(positive regulation of cytosolic calcium ion concentration);GO:0007565(female pregnancy);GO:0008152(metabolic process);GO:0030307(positive regulation of cell growth);GO:0030890(positive regulation of B cell proliferation);GO:0032024(positive regulation of insulin secretion);GO:0032355(response to estradiol);GO:0032526(resp…	GO:0005634(nucleus);GO:0005886(plasma membrane);GO:0009986(cell surface);GO:0016020(membrane);GO:0016021(integral component of membrane);GO:0070062(extracellular exosome)	GO:0003953(NAD+ nucleosidase activity);GO:0016740(transferase activity);GO:0016849(phosphorus-oxygen lyase activity);GO:0050135(NAD(P)+ nucleosidase activity)	-0.43753	-0.405977	0.907042	1.42856	1.90751	-0.229219	1.72817	1.16474	-0.412586	-0.221107	1.42646	-0.301371	0.0019662	-0.962731	0.211748	-0.769631	-0.0672281	1.53425	0.248837	2.70348	-0.0178928	0.402535	-0.0530128	-0.651722	-0.235926	0.601393	1.18845	-0.623937	0.215167	0.353707	0.617116	1	-0.079115	0.710785	1.44621	1.87213	1.03981	-0.145579	0.478979	0.534634	-0.833837	0.483449
50	35	CXCR6	A_23_P109913	chemokine (C-X-C motif) receptor 6	GO:0006935(chemotaxis);GO:0006954(inflammatory response);GO:0007186(G-protein coupled receptor signaling pathway);GO:0019079(viral genome replication);GO:0070098(chemokine-mediated signaling pathway)	GO:0005886(plasma membrane);GO:0005887(integral component of plasma membrane)	GO:0004930(G-protein coupled receptor activity);GO:0015026(coreceptor activity);GO:0016494(C-X-C chemokine receptor activity)	0.575433	0.78252	0.610473	1.57409	-0.142149	-1.18471	-2.14105	-1.65978	-2.1299	-2.61661	-0.129226	0.53344	0.0059025	-0.626147	-0.811887	-0.211115	-0.730235	-0.214193	-0.720554	-0.735562	-0.883645	-3.4652	0.698848	-1.55581	-0.798343	-1.61582	1	-0.466923	1.9704	1.99917	-0.106682	-0.109535	-1.33668	0.29559	0.402672	2.33789	1.83848	1.61936	0.995539	0.749601	0.654787	0.455583
51	10	FADS1	A_23_P203419	fatty acid desaturase 1	GO:0006355(regulation of transcription, DNA-templated);GO:0006636(unsaturated fatty acid biosynthetic process);GO:0007267(cell-cell signaling);GO:0008654(phospholipid biosynthetic process);GO:0009267(cellular response to starvation);GO:0033559(unsaturated fatty acid metabolic process);GO:0036109(alpha-linolenic acid metabolic process);GO:0043651(linoleic acid metabolic process);GO:0044255(cellula…	GO:0005739(mitochondrion);GO:0005789(endoplasmic reticulum membrane);GO:0016020(membrane);GO:0016021(integral component of membrane);GO:0043231(intracellular membrane-bounded organelle)	GO:0000248(C-5 sterol desaturase activity);GO:0005506(iron ion binding);GO:0016491(oxidoreductase activity);GO:0020037(heme binding)	0.265089	0.769817	2.78487	2.43557	-1.77272	-0.579093	-2.82997	-2.37883	-0.80724	-1.37121	-1.33319	-0.605133	-1.16447	-1.37333	-0.796453	-1.02456	-1.21148	1.41994	0.592062	-0.641424	-1.28807	-1.39556	2.09747	0.008774	1.44432	0.061091	-0.170959	-0.945727	1	-0.196458	-0.352617	-0.0222935	0.213354	0.49986	0.926518	0.983961	3.27767	1.72809	0.435323	-0.67487	0.472462	0.499074
52	15	ACAT2	A_23_P31135	acetyl-CoA acetyltransferase 2	GO:0006629(lipid metabolic process)	GO:0005634(nucleus);GO:0005654(nucleoplasm);GO:0005730(nucleolus);GO:0005737(cytoplasm);GO:0070062(extracellular exosome)	GO:0003985(acetyl-CoA C-acetyltransferase activity)	0.516195	-0.109899	1.3008	-0.230605	-0.2671	-0.343763	-2.61905	-1.97127	-1.58512	-2.29012	-1.25379	-1.09708	-1.03439	-1.76529	-1.0182	-1.26501	-1.28084	-1.37749	-0.711993	-0.209729	-1.01272	-1.59082	-0.334738	0.103881	2.08472	1	-0.265218	0.291558	0.411824	-0.6383	-0.700804	-0.444984	-1.33601	0.304243	0.867678	1.38443	2.19524	1.87303	0.476642	0.817682	0.921596	1.22898
53	3	ELOVL1	A_23_P23380	ELOVL fatty acid elongase 1	GO:0019367(fatty acid elongation, saturated fatty acid);GO:0019432(triglyceride biosynthetic process);GO:0030148(sphingolipid biosynthetic process);GO:0034625(fatty acid elongation, monounsaturated fatty acid);GO:0035338(long-chain fatty-acyl-CoA biosynthetic process);GO:0042761(very long-chain fatty acid biosynthetic process);GO:0044255(cellular lipid metabolic process);GO:0044281(small molecule…	GO:0005783(endoplasmic reticulum);GO:0005789(endoplasmic reticulum membrane);GO:0016020(membrane);GO:0030176(integral component of endoplasmic reticulum membrane)	GO:0005515(protein binding);GO:0009922(fatty acid elongase activity)	0.269478	0.032911	1.072	1.6603	-0.698984	-0.69606	-0.350353	-0.615319	-0.136926	-0.279641	-0.562017	-0.712205	-0.422316	-0.296077	-0.223959	-0.208061	-0.563299	-0.623522	-0.891556	-0.453732	-0.795329	-0.0576656	-0.023993	-0.617266	0.319878	-1.13481	0.246604	-0.77896	-0.0446546	-1.30231	-0.514898	0.483855	0.095705	0.244249	-0.198062	0.148412	1.29705	1.76248	0.6647	0.172795	0.165533	0.115541
54	1	ACACA	A_23_P141434	acetyl-CoA carboxylase alpha	GO:0001894(tissue homeostasis);GO:0006084(acetyl-CoA metabolic process);GO:0006112(energy reserve metabolic process);GO:0006633(fatty acid biosynthetic process);GO:0006766(vitamin metabolic process);GO:0006767(water-soluble vitamin metabolic process);GO:0006768(biotin metabolic process);GO:0006853(carnitine shuttle);GO:0019432(triglyceride biosynthetic process);GO:0031325(positive regulation of c…	GO:0005730(nucleolus);GO:0005737(cytoplasm);GO:0005739(mitochondrion);GO:0005829(cytosol);GO:0015629(actin cytoskeleton);GO:0070062(extracellular exosome)	GO:0003989(acetyl-CoA carboxylase activity);GO:0004075(biotin carboxylase activity);GO:0005515(protein binding);GO:0005524(ATP binding);GO:0046872(metal ion binding)	-1.46243	-1.2032	1.6914	1.78326	-1.37536	0.0980497	-0.665422	-0.434174	-0.861589	-1.43993	-0.721999	-1.31676	-1.0314	-0.103609	-1.46487	0.669751	1.33192	-0.0828683	-0.79303	-0.0241873	-0.944202	-0.417411	0.201236	-1.66694	-0.789121	-1.52429	-0.791737	-0.330304	-0.669346	-0.262401	-0.226288	0.728187	-0.30441	1	0.54027	0.368147	0.757392	1.66934	0.956794	0.978644	1.12809	0.515446
55	25	CD19	A_23_P113572	CD19 molecule	GO:0006968(cellular defense response);GO:0007166(cell surface receptor signaling pathway);GO:0007173(epidermal growth factor receptor signaling pathway);GO:0008543(fibroblast growth factor receptor signaling pathway);GO:0038095(Fc-epsilon receptor signaling pathway);GO:0045087(innate immune response);GO:0048011(neurotrophin TRK receptor signaling pathway);GO:0048015(phosphatidylinositol-mediated …	GO:0005886(plasma membrane);GO:0005887(integral component of plasma membrane);GO:0009897(external side of plasma membrane);GO:0043234(protein complex);GO:0070062(extracellular exosome)	GO:0005057(receptor signaling protein activity)	-0.196853	-0.394737	0.667067	0.0024597	-0.904856	-0.39816	-0.935085	0.0657217	0.299625	-0.172616	-0.169366	-0.423544	-0.574023	-0.03478	0.198041	-0.15161	-0.0401647	0.945389	-0.430677	-1.50306	-0.263618	-0.630625	-0.487749	0.423557	-0.0651925	2.13656	0.185815	-0.462015	-0.653259	-4.10461	0.255909	-0.208811	-0.078757	0.133069	1.08185	1.47881	0.214723	3.28022	1.06186	3.33288	0.956916	-1.21
56	76	TCF7	A_23_P7582	transcription factor 7 (T-cell specific, HMG-box)	GO:0006351(transcription, DNA-templated);GO:0006357(regulation of transcription from RNA polymerase II promoter);GO:0006955(immune response);GO:0007420(brain development);GO:0021915(neural tube development);GO:0030538(embryonic genitalia morphogenesis);GO:0033153(T cell receptor V(D)J recombination);GO:0042127(regulation of cell proliferation);GO:0044336(canonical Wnt signaling pathway involved i…	GO:0005634(nucleus);GO:0005654(nucleoplasm);GO:0005667(transcription factor complex)	GO:0003682(chromatin binding);GO:0003700(transcription factor activity, sequence-specific DNA binding);GO:0005515(protein binding);GO:0008013(beta-catenin binding);GO:0043565(sequence-specific DNA binding);GO:0044212(transcription regulatory region DNA binding)	-0.426937	-0.095868	-0.544396	-2.43969	-1.03436	-0.457958	-1.31776	-0.317476	1	-0.328131	-0.420758	-0.407965	-0.746699	-0.331033	-0.655151	0.36629	-0.516732	0.220417	0.535163	-0.241243	0.305749	-0.0834127	0.003348	0.128374	-0.439704	-1.20848	-0.461434	0.264654	0.552464	-0.0392766	-0.66749	0.244757	-0.324141	-0.0002075	0.101438	0.550758	1.4876	2.21205	1.71808	1.08709	1.17996	-0.0862947
57	54	IRF8	A_23_P332190	interferon regulatory factor 8	GO:0000122(negative regulation of transcription from RNA polymerase II promoter);GO:0006366(transcription from RNA polymerase II promoter);GO:0006909(phagocytosis);GO:0006955(immune response);GO:0019221(cytokine-mediated signaling pathway);GO:0030099(myeloid cell differentiation);GO:0032729(positive regulation of interferon-gamma production);GO:0032735(positive regulation of interleukin-12 produc…	GO:0005654(nucleoplasm);GO:0005829(cytosol)	GO:0000975(regulatory region DNA binding);GO:0003705(transcription factor activity, RNA polymerase II distal enhancer sequence-specific binding);GO:0005515(protein binding)	1.24433	0.886105	-1.04376	-1.21487	-0.783466	-0.971625	-0.527573	-0.438033	-0.59505	-0.638751	-0.41831	-0.512935	-0.521009	-1.02803	-0.915383	-0.253675	-0.699066	1.03426	0.787012	0.194467	-0.256296	1	0.728695	-0.801197	-0.652488	0.403181	1.96914	-0.807637	-0.743216	0.223771	-0.904031	-0.876125	-0.841404	1.29543	-0.148136	1.83598	2.10142	2.31229	1.40258	1.58605	1.51554	-0.338539
58	28	CD68	A_23_P15394	CD68 molecule	GO:0071310(cellular response to organic substance)	GO:0005765(lysosomal membrane);GO:0005886(plasma membrane);GO:0010008(endosome membrane);GO:0016020(membrane);GO:0016021(integral component of membrane)		0.070999	0.20275	-1.83667	-1.00349	-0.849777	-0.317696	-0.929533	-0.78381	-1.18208	-1.31029	-0.973633	-0.633235	-0.840074	-0.357115	-0.771745	1	-0.662524	-1.11799	-0.557154	-1.21473	-0.542667	-1.03025	-0.551761	0.061206	-0.994188	-0.95469	1.90425	-0.296784	0.334164	-0.619055	0.03011	-0.257182	0.302577	0.384481	1.41086	0.846139	1.83598	0.577065	0.595365	0.762558	0.194101	-0.793265
59	20	CCL5(RANTES)	A_23_P152838	chemokine (C-C motif) ligand 5	GO:0000165(MAPK cascade);GO:0002407(dendritic cell chemotaxis);GO:0002548(monocyte chemotaxis);GO:0002676(regulation of chronic inflammatory response);GO:0006468(protein phosphorylation);GO:0006816(calcium ion transport);GO:0006874(cellular calcium ion homeostasis);GO:0006887(exocytosis);GO:0006935(chemotaxis);GO:0006954(inflammatory response);GO:0007159(leukocyte cell-cell adhesion);GO:0007186(G…	GO:0005576(extracellular region);GO:0005615(extracellular space);GO:0005737(cytoplasm)	GO:0004435(phosphatidylinositol phospholipase C activity);GO:0004672(protein kinase activity);GO:0005515(protein binding);GO:0008009(chemokine activity);GO:0016004(phospholipase activator activity);GO:0030298(receptor signaling protein tyrosine kinase activator activity);GO:0031726(CCR1 chemokine receptor binding);GO:0031729(CCR4 chemokine receptor binding);GO:0031730(CCR5 chemokine receptor bind…	0.827768	0.305418	-0.220158	0.180941	-1.48935	-1.4587	0.226213	-1.93179	-1.36484	-1.69037	-2.35752	-0.663562	-0.802367	-0.659534	-1.01542	-0.19491	-0.905165	-2.17781	-1.25481	-1.32545	-1.66657	-1.129	-1.10122	-1.81987	-1.1816	-0.893083	1	-0.999108	0.453191	-1.01213	-0.671357	-1.28605	0.154557	-0.05047	1.18838	1.77751	1.79797	0.390181	1.24204	1.95223	1.50738	0.833292
60	7	ELOVL5	A_23_P156497	ELOVL fatty acid elongase 5	GO:0006636(unsaturated fatty acid biosynthetic process);GO:0019432(triglyceride biosynthetic process);GO:0033559(unsaturated fatty acid metabolic process);GO:0034625(fatty acid elongation, monounsaturated fatty acid);GO:0034626(fatty acid elongation, polyunsaturated fatty acid);GO:0035338(long-chain fatty-acyl-CoA biosynthetic process);GO:0036109(alpha-linolenic acid metabolic process);GO:0042761…	GO:0005783(endoplasmic reticulum);GO:0005789(endoplasmic reticulum membrane);GO:0016020(membrane);GO:0016021(integral component of membrane);GO:0043025(neuronal cell body)	GO:0005515(protein binding);GO:0009922(fatty acid elongase activity)	0.72004	-1.24365	-0.400128	-0.469416	-1.78722	-2.0962	-2.16348	-0.744628	-2.09168	-1.62441	-1.8551	-1.89935	-1.97244	-1.91697	-1.91446	-1.95292	-1.75828	-2.19101	-2.07633	-1.72538	-1.74081	-1.58549	-0.819411	-1.65808	-1.12437	1.04732	-0.956085	-1.59157	-0.826635	0.197896	1	0.47419	0.105947	0.887699	0.350204	1.75813	2.247	3.81291	1.49409	0.993619	1.87825	2.5427
61	73	VEGFA	A_23_P70398	vascular endothelial growth factor A	GO:0000122(negative regulation of transcription from RNA polymerase II promoter);GO:0001525(angiogenesis);GO:0001541(ovarian follicle development);GO:0001569(patterning of blood vessels);GO:0001570(vasculogenesis);GO:0001666(response to hypoxia);GO:0001701(in utero embryonic development);GO:0001822(kidney development);GO:0001934(positive regulation of protein phosphorylation);GO:0001938(positive …	GO:0005576(extracellular region);GO:0005578(proteinaceous extracellular matrix);GO:0005615(extracellular space);GO:0005737(cytoplasm);GO:0009986(cell surface);GO:0016020(membrane);GO:0030141(secretory granule);GO:0031093(platelet alpha granule lumen)	GO:0001968(fibronectin binding);GO:0005125(cytokine activity);GO:0005161(platelet-derived growth factor receptor binding);GO:0005172(vascular endothelial growth factor receptor binding);GO:0005515(protein binding);GO:0008083(growth factor activity);GO:0008201(heparin binding);GO:0042056(chemoattractant activity)	0.806767	-1.05155	-3.51476	-3.52845	-2.28764	-1.27872	-2.79061	-1.4213	-2.07475	-2.73438	-3.19187	-2.95118	-2.87761	-1.86804	-1.66554	-1.5175	-3.226	-3.72569	-0.884258	-2.4225	-1.3281	-4.10241	-0.333925	-1.11638	-0.591765	-0.489473	-1.20074	-0.051943	1	-1.34322	0.508053	1.40839	0.795585	0.315726	0.959538	0.968741	2.56896	3.8793	0.83361	2.34555	2.02914	0.933007
62	34	CXCR5	A_24_P252945	chemokine (C-X-C motif) receptor 5	GO:0006928(movement of cell or subcellular component);GO:0006935(chemotaxis);GO:0006955(immune response);GO:0007186(G-protein coupled receptor signaling pathway);GO:0032467(positive regulation of cytokinesis);GO:0042113(B cell activation);GO:0048535(lymph node development);GO:0070098(chemokine-mediated signaling pathway)	GO:0005886(plasma membrane);GO:0005887(integral component of plasma membrane);GO:0009897(external side of plasma membrane)	GO:0004930(G-protein coupled receptor activity);GO:0005515(protein binding);GO:0016494(C-X-C chemokine receptor activity)	0.535166	0.379591	-0.938279	-1.09848	-1.1095	-1.11308	-0.952135	-2.20672	-3.09984	-3.17232	-3.24283	-2.543	-2.77415	-1.82664	-0.745678	-2.37788	-3.35947	-1.87715	-2.25121	-2.55948	-3.04591	-3.24775	-0.969206	-0.319724	-0.285294	-1.3042	-4.34832	-0.302647	0.70314	-2.30162	-0.228643	0.51515	0.267005	0.484358	2.56803	1.27328	1.38776	2.46951	1.47028	1.64083	1.61638	1.48649
63	16	ACTA2	A_23_P150053	actin, alpha 2, smooth muscle, aorta	GO:0006936(muscle contraction);GO:0008217(regulation of blood pressure);GO:0009615(response to virus);GO:0014829(vascular smooth muscle contraction);GO:0072144(glomerular mesangial cell development)	GO:0005615(extracellular space);GO:0005737(cytoplasm);GO:0005829(cytosol);GO:0015629(actin cytoskeleton);GO:0030485(smooth muscle contractile fiber);GO:0043234(protein complex);GO:0070062(extracellular exosome)	GO:0005524(ATP binding);GO:0019901(protein kinase binding)	1.0452	-0.594982	1	-0.469847	-2.06344	-1.24069	-1.91919	-1.56382	-3.5617	-4.807	-3.23673	-2.12668	-2.48292	-1.44755	-0.943868	-3.51186	-3.06576	-3.95598	-2.83839	-4.91316	-4.94442	-4.73548	-0.710819	-2.95823	-4.0286	-2.10813	-0.088329	-1.21329	-0.0286734	-1.01599	0.91779	0.728135	0.392543	0.173381	1.90939	0.255678	1.79958	2.53991	1.05841	1.7323	1.34987	0.771773
64	77	TCF12	A_23_P151930	transcription factor 12	GO:0006351(transcription, DNA-templated);GO:0006357(regulation of transcription from RNA polymerase II promoter);GO:0006955(immune response);GO:0007517(muscle organ development);GO:0045666(positive regulation of neuron differentiation);GO:0045944(positive regulation of transcription from RNA polymerase II promoter)	GO:0000790(nuclear chromatin);GO:0005634(nucleus);GO:0005737(cytoplasm)	GO:0000978(RNA polymerase II core promoter proximal region sequence-specific DNA binding);GO:0001077(transcriptional activator activity, RNA polymerase II core promoter proximal region sequence-specific binding);GO:0003700(transcription factor activity, sequence-specific DNA binding);GO:0005515(protein binding);GO:0008134(transcription factor binding);GO:0035326(enhancer binding);GO:0043425(bHLH …	0.332021	-0.201716	-0.575976	-0.325425	-1.46664	-0.295392	-1.2107	-1.49927	-0.359355	-0.830128	-1.23622	-1.69668	-0.150755	-1.15074	-0.182392	-0.278607	-1.00995	-1.57485	-0.100151	-1.50867	-0.489553	-0.98829	-0.48822	-1.08279	-2.04256	-0.159255	1	-0.729934	0.264779	-3.91397	0.561954	0.068828	0.609367	0.83267	-0.518426	0.836299	1.67212	2.13378	1.1586	1.40884	1.32097	1.24768
65	31	CTNNB1	A_23_P29495	catenin (cadherin-associated protein), beta 1, 88kDa	GO:0000122(negative regulation of transcription from RNA polymerase II promoter);GO:0000578(embryonic axis specification);GO:0001569(patterning of blood vessels);GO:0001658(branching involved in ureteric bud morphogenesis);GO:0001701(in utero embryonic development);GO:0001702(gastrulation with mouth forming second);GO:0001708(cell fate specification);GO:0001711(endodermal cell fate commitment);GO…	GO:0000922(spindle pole);GO:0005634(nucleus);GO:0005654(nucleoplasm);GO:0005667(transcription factor complex);GO:0005719(nuclear euchromatin);GO:0005737(cytoplasm);GO:0005813(centrosome);GO:0005829(cytosol);GO:0005886(plasma membrane);GO:0005911(cell-cell junction);GO:0005912(adherens junction);GO:0005913(cell-cell adherens junction);GO:0005916(fascia adherens);GO:0005923(bicellular tight junctio…	GO:0001102(RNA polymerase II activating transcription factor binding);GO:0003690(double-stranded DNA binding);GO:0003700(transcription factor activity, sequence-specific DNA binding);GO:0003713(transcription coactivator activity);GO:0004871(signal transducer activity);GO:0005515(protein binding);GO:0008022(protein C-terminus binding);GO:0008134(transcription factor binding);GO:0019899(enzyme bind…	0.620537	1	-3.15376	-2.92062	-1.05715	-0.528215	-0.78187	-1.46275	-1.60423	-1.12183	-0.651897	-2.33704	-0.666401	-2.21175	-0.669497	-0.417112	-1.26431	-2.69001	-1.08133	-2.22636	-1.32663	-2.97678	-0.256826	-1.28034	-0.835627	-2.60302	-0.301472	-1.0726	0.147308	0.017916	0.347618	0.218045	-0.605235	0.440662	-0.019496	0.0798353	0.954882	1.47867	1.14006	0.111209	0.198623	1.21195
66	37	FAP	A_23_P56746	fibroblast activation protein, alpha	GO:0001525(angiogenesis);GO:0006508(proteolysis);GO:0007155(cell adhesion);GO:0010710(regulation of collagen catabolic process);GO:0010716(negative regulation of extracellular matrix disassembly);GO:0043542(endothelial cell migration);GO:0051603(proteolysis involved in cellular protein catabolic process);GO:0051917(regulation of fibrinolysis);GO:0060244(negative regulation of cell proliferation i…	GO:0005615(extracellular space);GO:0005737(cytoplasm);GO:0005886(plasma membrane);GO:0005925(focal adhesion);GO:0009986(cell surface);GO:0016021(integral component of membrane);GO:0030027(lamellipodium);GO:0031258(lamellipodium membrane);GO:0032587(ruffle membrane);GO:0045177(apical part of cell);GO:0045178(basal part of cell);GO:0071438(invadopodium membrane)	GO:0002020(protease binding);GO:0004175(endopeptidase activity);GO:0004222(metalloendopeptidase activity);GO:0004252(serine-type endopeptidase activity);GO:0005178(integrin binding);GO:0005515(protein binding);GO:0008233(peptidase activity);GO:0008236(serine-type peptidase activity);GO:0008239(dipeptidyl-peptidase activity);GO:0042803(protein homodimerization activity);GO:0046983(protein dimeriza…	-0.221042	0.450565	-0.940537	-1.15394	-0.976597	-1.25976	0.357938	-0.873002	-0.855744	-0.853625	0.167485	-0.854087	-0.897964	-0.916535	-0.419167	-0.987214	-1.27504	-0.991597	-0.649425	-0.511626	-0.72057	0.383133	-0.873443	-1.01967	-1.00848	1.94383	-0.920917	-0.175695	-0.939468	-0.148238	0.665866	1	-1.02073	1.59635	0.893162	-0.321798	0.650722	1.99894	2.05514	0.976176	1.0096	-0.895456
67	65	SCD	A_23_P63618	stearoyl-CoA desaturase (delta-9-desaturase)	GO:0006633(fatty acid biosynthetic process);GO:0055114(oxidation-reduction process)	GO:0005783(endoplasmic reticulum);GO:0005789(endoplasmic reticulum membrane);GO:0016020(membrane);GO:0016021(integral component of membrane)	GO:0004768(stearoyl-CoA 9-desaturase activity);GO:0005506(iron ion binding)	0.595977	-0.049709	-1.57033	-2.41495	-0.645411	-1.05865	0.380591	-1.20908	0.151087	-0.631319	-0.653605	-2.09841	-1.04076	-1.04795	-1.63347	-1.33804	-0.183002	-3.8958	-1.67828	-2.7399	-1.93934	-2.75878	0.872392	1.22486	0.498902	-0.033912	0.778474	-1.24181	-0.794835	-2.99789	-0.005557	1	-0.145107	-0.901985	0.622629	0.959514	3.59422	1.7985	1.79123	0.378334	0.122018	0.629495
68	14	ACAT1	A_23_P24515	acetyl-CoA acetyltransferase 1	GO:0001889(liver development);GO:0007420(brain development);GO:0009083(branched-chain amino acid catabolic process);GO:0009725(response to hormone);GO:0014070(response to organic cyclic compound);GO:0034641(cellular nitrogen compound metabolic process);GO:0042594(response to starvation);GO:0044255(cellular lipid metabolic process);GO:0044281(small molecule metabolic process);GO:0046950(cellular k…	GO:0005739(mitochondrion);GO:0005743(mitochondrial inner membrane);GO:0005759(mitochondrial matrix);GO:0070062(extracellular exosome)	GO:0003985(acetyl-CoA C-acetyltransferase activity);GO:0019899(enzyme binding);GO:0042803(protein homodimerization activity);GO:0046872(metal ion binding);GO:0050662(coenzyme binding)	0.901475	-2.31376	-0.935385	-2.71336	-1.34049	-1.12495	-3.46097	-0.4815	-0.364751	-1.11669	-0.550495	0.347233	0.357611	-0.361316	-0.353606	-2.17913	-3.24478	-3.50643	-0.595009	-0.0817856	-2.18828	0.234002	-0.758104	0.137127	1.17059	0.187474	-0.0543223	-0.246715	-1.16102	-3.26884	-0.506555	-0.9227	0.364823	0.966383	0.872979	1.68598	1.89729	0.271809	1.41	0.294841	0.582538	0.69647
69	17	BATF3	A_23_P160720	basic leucine zipper transcription factor, ATF-like 3	GO:0000122(negative regulation of transcription from RNA polymerase II promoter);GO:0006366(transcription from RNA polymerase II promoter);GO:0009615(response to virus);GO:0043011(myeloid dendritic cell differentiation);GO:0097028(dendritic cell differentiation)	GO:0005634(nucleus)	GO:0000978(RNA polymerase II core promoter proximal region sequence-specific DNA binding);GO:0001078(transcriptional repressor activity, RNA polymerase II core promoter proximal region sequence-specific binding);GO:0003700(transcription factor activity, sequence-specific DNA binding);GO:0003714(transcription corepressor activity)	0.612474	-0.323	-1.56582	-1.88146	0.0377184	-0.489015	0.35224	0.517403	0.217923	0.72071	0.25404	-0.261625	-0.108758	-0.723959	-1.14303	-0.124811	0.284725	1.5035	-0.232868	0.409816	-0.461275	1.2552	-0.612602	-0.483048	-0.631436	-0.146591	0.367702	-1.1208	0.64179	0.476103	0.610467	0.141945	-0.618027	0.0662394	0.963313	-0.0590706	0.0759167	1.39846	0.107652	0.266474	-0.157408	0.642834
70	11	FADS2	A_23_P98580	fatty acid desaturase 2	GO:0006636(unsaturated fatty acid biosynthetic process);GO:0033559(unsaturated fatty acid metabolic process);GO:0036109(alpha-linolenic acid metabolic process);GO:0043651(linoleic acid metabolic process);GO:0044281(small molecule metabolic process);GO:0055114(oxidation-reduction process)	GO:0005789(endoplasmic reticulum membrane);GO:0005887(integral component of plasma membrane);GO:0016020(membrane)	GO:0004768(stearoyl-CoA 9-desaturase activity);GO:0005506(iron ion binding);GO:0020037(heme binding)	0.585517	-0.803377	-0.488607	-0.728354	-1.04874	-0.509603	0.40886	-0.234519	0.003344	-0.129686	-0.476175	-0.548686	-0.82097	-0.367036	-0.257643	-0.17348	0.460129	0.358571	0.757754	-0.0437084	0.355152	0.41016	1.18478	-0.186412	-0.125879	-0.413452	0.989283	-0.285407	-0.020088	-0.396915	0.320223	0.109499	-0.739267	-0.410446	0.999307	-0.66403	1.41223	0.180158	-0.966596	0.428636	0.782736	1.23829
71	45	HAVCR2(TIM3)	A_24_P411561	hepatitis A virus cellular receptor 2		GO:0016021(integral component of membrane);GO:0070062(extracellular exosome)		-0.16888	0.771065	-1.84624	-1.86224	1.81072	0.170199	-0.369818	-1.49451	-1.75803	1	0.411642	0.32944	-1.75184	-1.71083	-1.78069	0.241713	-1.54954	-0.564284	1.25036	-1.82204	-1.66608	-1.71103	-0.807737	-0.506325	1.10787	-1.57296	0.564479	-1.6829	0.415342	-1.66075	0.0387302	-0.718973	0.915075	1.22811	0.0170319	-1.59401	0.620661	-0.0772641	1.31122	0.902829	1.12792	1.58481
72	78	CCND1	A_24_P193011	cyclin D1	GO:0000082(G1/S transition of mitotic cell cycle);GO:0000122(negative regulation of transcription from RNA polymerase II promoter);GO:0000278(mitotic cell cycle);GO:0000320(re-entry into mitotic cell cycle);GO:0001889(liver development);GO:0001934(positive regulation of protein phosphorylation);GO:0006325(chromatin organization);GO:0006351(transcription, DNA-templated);GO:0006468(protein phosphor…	GO:0000307(cyclin-dependent protein kinase holoenzyme complex);GO:0005622(intracellular);GO:0005634(nucleus);GO:0005654(nucleoplasm);GO:0005829(cytosol);GO:0005923(bicellular tight junction);GO:0016020(membrane);GO:0017053(transcriptional repressor complex)	GO:0003714(transcription corepressor activity);GO:0004672(protein kinase activity);GO:0005515(protein binding);GO:0008134(transcription factor binding);GO:0016538(cyclin-dependent protein serine/threonine kinase regulator activity);GO:0019899(enzyme binding);GO:0019901(protein kinase binding);GO:0032403(protein complex binding);GO:0042826(histone deacetylase binding);GO:0070064(proline-rich regio…	-0.130485	1	-1.72365	-1.42325	-0.05114	0.074694	-0.696216	-0.621203	-0.34671	-0.353313	-0.264918	-0.125887	-0.336267	0.201074	0.208124	0.054789	-0.711785	-0.720777	0.37597	-0.667319	-0.068662	-0.165966	-0.393499	1.09306	-0.58165	-0.695427	-0.490386	0.25557	0.643321	0.335784	0.36098	0.585764	1.82791	0.218208	1.23937	0.61211	0.563576	0.724621	0.681508	-0.131756	0.111003	0.610177
73	2	FASN	A_23_P44132	fatty acid synthase	GO:0001649(osteoblast differentiation);GO:0006084(acetyl-CoA metabolic process);GO:0006112(energy reserve metabolic process);GO:0006631(fatty acid metabolic process);GO:0006633(fatty acid biosynthetic process);GO:0006766(vitamin metabolic process);GO:0006767(water-soluble vitamin metabolic process);GO:0015939(pantothenate metabolic process);GO:0019432(triglyceride biosynthetic process);GO:0031325…	GO:0005737(cytoplasm);GO:0005739(mitochondrion);GO:0005794(Golgi apparatus);GO:0005829(cytosol);GO:0005886(plasma membrane);GO:0016020(membrane);GO:0042470(melanosome);GO:0042587(glycogen granule);GO:0070062(extracellular exosome)	GO:0004312(fatty acid synthase activity);GO:0004313([acyl-carrier-protein] S-acetyltransferase activity);GO:0004314([acyl-carrier-protein] S-malonyltransferase activity);GO:0004315(3-oxoacyl-[acyl-carrier-protein] synthase activity);GO:0004316(3-oxoacyl-[acyl-carrier-protein] reductase (NADPH) activity);GO:0004317(3-hydroxypalmitoyl-[acyl-carrier-protein] dehydratase activity);GO:0004319(enoyl-[a…	0.112439	-0.512255	-3.69735	-4.33248	1	0.123461	-1.67556	-1.71317	-0.131296	-0.163938	-0.759998	-0.367121	-0.881902	-0.830299	-0.841288	0.196866	-1.465	-1.7691	-0.26439	-0.309084	-1.31156	0.197273	-0.195572	0.0165716	0.0748077	0.208793	1.08345	0.27419	0.754103	0.48772	0.188937	0.721946	0.515188	0.242896	-0.819921	0.606625	1.1177	-0.623	0.982364	0.308086	0.610852	0.11518
74	69	TGFB1	A_24_P79054	transforming growth factor, beta 1	GO:0000060(protein import into nucleus, translocation);GO:0000122(negative regulation of transcription from RNA polymerase II promoter);GO:0000165(MAPK cascade);GO:0001657(ureteric bud development);GO:0001666(response to hypoxia);GO:0001837(epithelial to mesenchymal transition);GO:0001933(negative regulation of protein phosphorylation);GO:0001934(positive regulation of protein phosphorylation);GO…	GO:0005576(extracellular region);GO:0005578(proteinaceous extracellular matrix);GO:0005615(extracellular space);GO:0005634(nucleus);GO:0005737(cytoplasm);GO:0005796(Golgi lumen);GO:0005886(plasma membrane);GO:0005902(microvillus);GO:0009986(cell surface)	GO:0001948(glycoprotein binding);GO:0003823(antigen binding);GO:0005114(type II transforming growth factor beta receptor binding);GO:0005125(cytokine activity);GO:0005515(protein binding);GO:0008083(growth factor activity)	-0.223847	0.497816	-2.2535	-3.61339	0.578837	-0.324928	-0.736637	0.110517	-0.816026	0.205801	0.0326103	1.30431	0.0899733	0.625576	-0.0841297	-0.467762	-1.03099	-2.03713	-0.412253	0.690086	-1.09282	-1.66149	0.552529	0.631598	-0.373966	-0.211991	0.656398	-0.309711	1.21182	1.70017	0.737128	-0.352933	1.48435	1.53473	-0.940523	1.0217	0.797306	-0.590817	0.957443	0.923139	0.302662	-1.00865
75	56	LGALS9	A_23_P116557	lectin, galactoside-binding, soluble, 9	GO:0007165(signal transduction);GO:0043123(positive regulation of I-kappaB kinase/NF-kappaB signaling)	GO:0005737(cytoplasm);GO:0070062(extracellular exosome)	GO:0004871(signal transducer activity);GO:0005534(galactose binding);GO:0030246(carbohydrate binding)	0.154112	0.391989	-0.763778	-0.968252	0.449468	-1.23174	-2.68696	-0.909864	-1.93159	0.045453	-1.1138	0.095359	0.768713	1	0.575128	-0.0547085	-3.7485	-3.68707	-0.005129	1.68946	-0.190775	-1.19873	-0.132854	-0.092725	-0.673773	0.612508	-0.488592	0.910413	1.31566	1.93015	0.275638	0.565814	0.359751	0.770714	0.404973	1.7612	1.50852	0.610006	0.83273	-0.252919	0.788261	-0.782951
76	79	CCND2	A_24_P270235	cyclin D2	GO:0001934(positive regulation of protein phosphorylation);GO:0007049(cell cycle);GO:0045737(positive regulation of cyclin-dependent protein serine/threonine kinase activity);GO:0051301(cell division)	GO:0000307(cyclin-dependent protein kinase holoenzyme complex);GO:0000785(chromatin);GO:0005634(nucleus);GO:0005654(nucleoplasm);GO:0005730(nucleolus);GO:0005829(cytosol);GO:0031965(nuclear membrane)	GO:0005515(protein binding);GO:0019901(protein kinase binding)	0.538334	0.512004	-5.9534	-5.05949	0.005041	0.387218	-1.86742	-0.968463	0.594217	-0.711401	0.654569	-1.32515	-0.676896	0.48782	-0.413807	-1.14485	-2.67692	-6.07957	-2.20657	0.449969	1	-2.6993	-0.268574	0.171772	0.21589	1.19026	0.366258	1.56865	0.811849	1.42673	-0.368696	-1.94483	-2.03048	-0.594327	1.18224	1.35874	0.826712	0.309938	1.68782	0.510484	0.747188	-2.22151
77	72	TNFRSF14	A_23_P126908	tumor necrosis factor receptor superfamily, member 14	GO:0002741(positive regulation of cytokine secretion involved in immune response);GO:0006955(immune response);GO:0007166(cell surface receptor signaling pathway);GO:0009615(response to virus);GO:0016032(viral process);GO:0031295(T cell costimulation);GO:0033209(tumor necrosis factor-mediated signaling pathway);GO:0046642(negative regulation of alpha-beta T cell proliferation);GO:0050731(positive …	GO:0005886(plasma membrane);GO:0005887(integral component of plasma membrane);GO:0009897(external side of plasma membrane)	GO:0001618(virus receptor activity);GO:0005031(tumor necrosis factor-activated receptor activity);GO:0005515(protein binding);GO:0031625(ubiquitin protein ligase binding)	0.914981	0.724984	-6.74677	-5.984	0.5952	-0.601056	-2.24067	-0.760844	-2.07195	-1.38848	-1.83909	-0.024607	-1.06055	0.008946	-0.567397	-2.56164	-2.54876	-3.83329	-1.88377	0.679753	0.140093	0.736091	-1.24394	0.56036	-1.04731	-0.900402	-0.409983	0.271155	0.10663	-1.1334	-0.917057	-0.833128	-0.950118	0.143505	0.643272	0.785595	-0.305388	0.027963	-0.23807	0.490354	1	1.51655
78	66	SDC1	A_24_P97129	syndecan 1	GO:0001523(retinoid metabolic process);GO:0001657(ureteric bud development);GO:0005975(carbohydrate metabolic process);GO:0006024(glycosaminoglycan biosynthetic process);GO:0006027(glycosaminoglycan catabolic process);GO:0006954(inflammatory response);GO:0007603(phototransduction, visible light);GO:0009405(pathogenesis);GO:0009636(response to toxic substance);GO:0030198(extracellular matrix organ…	GO:0005737(cytoplasm);GO:0005796(Golgi lumen);GO:0005886(plasma membrane);GO:0005887(integral component of plasma membrane);GO:0005925(focal adhesion);GO:0009897(external side of plasma membrane);GO:0009986(cell surface);GO:0043202(lysosomal lumen);GO:0043234(protein complex);GO:0070062(extracellular exosome)	GO:0001948(glycoprotein binding);GO:0005515(protein binding);GO:0008022(protein C-terminus binding)	0.029798	-0.236862	-2.56928	-2.7249	-0.135919	1	-1.3103	-1.84088	-1.4728	-1.31215	-1.00712	-0.687371	-0.770125	-0.596285	-0.55773	-0.276311	-1.19912	-1.14829	-0.204721	-0.717698	-0.723341	-1.80209	-1.00486	-0.198056	-0.478949	0.46301	-0.149082	0.584733	0.685571	-0.44691	0.493917	0.107163	0.002378	0.58761	0.865417	0.926128	0.985707	1.15595	1.46998	1.16617	0.6515	0.500308
79	67	STAT1	A_24_P274270	signal transducer and activator of transcription 1, 91kDa	GO:0000122(negative regulation of transcription from RNA polymerase II promoter);GO:0001937(negative regulation of endothelial cell proliferation);GO:0002053(positive regulation of mesenchymal cell proliferation);GO:0003340(negative regulation of mesenchymal to epithelial transition involved in metanephros morphogenesis);GO:0006357(regulation of transcription from RNA polymerase II promoter);GO:0…	GO:0000790(nuclear chromatin);GO:0005634(nucleus);GO:0005654(nucleoplasm);GO:0005730(nucleolus);GO:0005737(cytoplasm);GO:0005829(cytosol);GO:0030424(axon);GO:0030425(dendrite)	GO:0000978(RNA polymerase II core promoter proximal region sequence-specific DNA binding);GO:0000979(RNA polymerase II core promoter sequence-specific DNA binding);GO:0000983(transcription factor activity, RNA polymerase II core promoter sequence-specific);GO:0003690(double-stranded DNA binding);GO:0003700(transcription factor activity, sequence-specific DNA binding);GO:0004871(signal transducer …	-0.0322094	0.572001	0.188811	-1.21522	-0.295779	-0.348438	0.416958	-0.708919	-1.06978	-0.759693	-0.240031	0.244175	-0.28684	-0.517015	-0.218834	-0.551617	-0.870346	-0.800971	0.070574	0.420524	-0.501462	-0.6122	-0.784494	-0.517655	-2.26234	-0.0440264	-0.035841	-0.190009	0.34621	0.245472	-0.013849	0.399035	1.44448	0.152158	0.168137	0.765672	-0.316234	-0.762873	0.91579	0.19034	1.23033	0.152969
[truncated: 29 more columns]
